# Supplementary material for: Cellular reprogramming by the conjoint action of ERα, FOXA1, and GATA3 to a ligand-inducible growth state
Source: PubMed Central journal article supplement — Mol Syst Biol. 2011 Aug 30;7:526. doi: 10.1038/msb.2011.59 (PMC3202798; doi:10.1038/msb.2011.59), 2011-08-30

**Supplemental information for**

**Cellular reprogramming by the conjoint action of estrogen receptor  $\alpha$ , FOXA1 and GATA3 to a ligand inducible growth state**

Say Li Kong<sup>#</sup>, Guoliang Li<sup>#</sup>, Siang Lin Loh, Wing-Kin Sung, Edison T. Liu<sup>\*</sup>

<sup>#</sup> These authors contributed equally to this work.

<sup>\*</sup> Corresponding author:

Edison T. Liu

Genome Institute of Singapore

60 Biopolis, Singapore 138672

T. 65 6808 8038; F. 65 6808 9051

Email: [liue@gis.a-star.edu.sg](mailto:liue@gis.a-star.edu.sg)

Submitted: December 30<sup>th</sup>, 2010

Revised: June 15<sup>th</sup>, 2011

**This supplemental information includes:**

**Supplemental Methods**

**Supplemental Tables I-XIII**

**Supplemental Figure S1-S16**

## **SUPPLEMENTAL METHODS**

### **Short reads mapping**

The reads of 25 bp from each library were mapped independently to the reference genome hg18 using the BatMan package (Tennakoon et al, manuscript in preparation). BatMan is a Burrows-Wheeler-Transform-based (BWT) method which maps short sequences to a reference genome at a very high speed. Up to 2 bp mismatches were allowed. The non-mappable reads and reads with more than 2 "best mapping" genomic locations were removed. The best mapping means, if a read has mapping locations without mis-match (as 0 mis-match), the best mapping will be the locations without mis-match; if a read has no mapping location with 0 mis-match, the mapping locations with 1 mis-match will be the best mapping locations; and the same for 2 mis-matches, etc. Only the best unique mapped location for each mappable read was kept for further processing.

### **Fold change of the numbers of binding sites before and after E<sub>2</sub> treatment**

From Supplemental Table S1, there may be concerns that the sequencing depth of the library has some effects on the number of binding sites. To minimize the effect of the sequencing depth on the fold change of the numbers of binding sites before and after E<sub>2</sub> treatment, we normalized the fold change of the numbers of binding sites with the sequencing depth. Using ER $\alpha$  library as an example, the sequencing depths are 13.6 million reads before E<sub>2</sub> treatment and 8 million reads after E<sub>2</sub> treatment. There are 1990 binding sites before E<sub>2</sub> treatment and 19412 binding sites after E<sub>2</sub> treatment. We computed the fold change of the numbers of binding sites as follows:

$$\text{normalized fold change of the number of binding sites} = \frac{\frac{19412}{1990}}{\frac{8}{13.6}} = 16.58$$

### Assigning peaks to genes

In order to assign peaks to genes, we look for the nearest TSS from the UCSC RefSeq genes for each peak. If the distance from the peak to the nearest TSS is less than 20Kb, the peak will be assigned to the TSS. In this way, each peak is assigned to at most one TSS. However, each TSS may have a few peaks assigned from the same TF. If a TSS is the nearest TSS to at least one ER $\alpha$  peak, we will associate this TSS to the ER $\alpha$  peak, regardless of the number of possible ER $\alpha$  peaks within the distance of 20kb. Similarly, the same TSS can be associated to FOXA1 and GATA3 peaks. Based on the condition whether the TSS is associated with ER $\alpha$ , FOXA1 and GATA3 peaks, the TSS will be grouped into 8 different categories: 1) with ER $\alpha$ +FOXA1+GATA3 peaks; 2) with ER $\alpha$ +FOXA1 peaks; 3) with ER $\alpha$ +GATA3 peaks; 4) with FOXA1+GATA3 peaks; 5) with ER $\alpha$  peaks only; 6) with FOXA1 peaks only; 7) with GATA3 peaks only; and 8) without any peaks.

For the category with ER $\alpha$ +FOXA1+GATA3 peaks, the situation can be sub-divided into two sub-categories with/without ER $\alpha$ +FOXA1+GATA3 conjoint peaks as shown in the following illustrations. In the left figure, we associated the TSS with ER $\alpha$ +FOXA1+GATA3 non-overlapped peaks. In the right figure, we associated the TSS with overlapped (or conjoint) ER $\alpha$ +FOXA1+GATA3 peaks.

Non-overlapped ER $\alpha$ +FOXA1+ GATA3 peaks

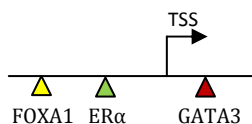

Overlapped ER $\alpha$ +FOXA1+ GATA3 peaks

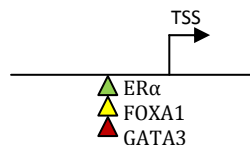

### **Analysis on the Expression Profiles of MDA-MB-231 Transfectant Cells**

We have three different MDA-MB-231 transfectant cells: transfected with vector control, ER $\alpha$ -only, and ER $\alpha$ +FOXA1+GATA3. These different MDA-MB-231 transfectants were subjected to estrogen and vehicle treatment, the cells were collected at day 2 and day 10 before proceeding to microarray experiment performed on 3 biological replicates.

The gene expression was calculated in the following procedure. The expression of the probes is measured by the fold change of the raw intensities from E<sub>2</sub> treatment over the raw intensities from vehicle treatment, and followed by median-normalization in each replicate. The normalized expression from the probes was averaged from three replicates. The expression of the probes from the same genes was averaged to generate the final expression level of the genes. The genes with fold change over 1.2 are called as up-regulated genes, and the genes with fold change lower than 0.83 are called as down-regulated genes. The E<sub>2</sub>-regulated genes from the vector-control MDA-MB-231 cells, ER $\alpha$ -expressing MDA-MB-231 cells and ER $\alpha$ +FOXA1+GATA3-expressing MDA-MB-231 cells are overlapped with the E<sub>2</sub>-regulated genes from MCF-7, and this list of genes are used to compare the expression from different cells.

For the comparison of MDA-MB-231 transfectants and MCF-7, we used a growth normalized strategy. This means that the time points that are compared are selected by the time of equivalent phenotype. This strategy was used in defining *MYC* effects on apoptosis where different conditions gave the same gene responses but with different phasing (Yu Q. *et al*, 2002). In our experimental case, we found that MDA-MB-231-ER $\alpha$ +FOXA1+GATA3 triple transfectant exhibited E<sub>2</sub> stimulated growth only after day 7 and maximally by day 10. By contrast, MCF-7 showed near optimal growth induction after 24 hours of E<sub>2</sub> exposure.

Therefore, our array comparison was between the 24 hours time-point for MCF-7 and 10 days for MDA-MB-231- ER $\alpha$ +FOXA1+GATA3 (see Supplemental Table X).

We assessed the expression level of E<sub>2</sub>-responsive genes in the MDA-MB-231-ER $\alpha$ +FOXA1+GATA3 normalized to the MDA-MB-231-vector control cells at 10 days and observed that specific genes previously known to be E<sub>2</sub>-regulated in the ER $\alpha$  responsive cell lines (Frasor J. *et al*, 2003) such as *CCND1*, *STC2*, *ADCY9* and *BTG1* were also regulated in the same direction by ligand in the triple factor transfected MDA-MB-231 cells (Supplemental Table XI).

### **Analysis on the Expression Levels of Luminal and Basal Marker Genes**

Based on the recently published luminal and basal marker gene list from Kao *et al* (Kao *et al*, 2009), we included 45 luminal marker genes and 49 basal marker genes (referred to as the luminal/basal cassette) that present in both our MCF-7 and transfected MDA-MB-231 expression data. We generated the box plots for the expression levels of these luminal and basal marker genes in the MCF-7 and transfected MDA-MB-231 cells 2 days after estrogen stimulation (see Supplemental Figure S14A-B). Additionally, we assessed the expression changes of the luminal/basal cassette from MDA-MB-231 cells transfected with vector control to the MDA-MB-231 cells transfected with ER $\alpha$ +FOXA1+GATA3. The expression level of a gene from the MDA-MB-231 cells transfected with ER $\alpha$ +FOXA1+GATA3 was deducted with the expression level of the same gene from the MDA-MB-231 cells transfected with vector control. The average expression differences from luminal and basal marker genes were shown in the Supplemental Figure S14C.

## **Co-motif Analysis Using Pomoda**

Peak Oriented Motif Discovery Algorithm (Pomoda) (Zhang *et al*, in preparation) is a position-weight-matrix-optimization method for de novo motif finding from ChIP-seq peaks. Pomoda takes into consideration the peak locations and intensities to give more weights to the motifs near the center of the peaks and from the peaks with high peak intensities. It utilizes all the peaks for motif finding, which is possible to identify all the potential co-factors for a transcription factor of interest.

## SUPPLEMENTAL TABLES

**Table I.** The tabulation for the number of reads and binding sites from individual ChIP-seq libraries used in this study.

| ChIP-seq libraries          | Number of binding sites | Number of uniquely mapped reads | Reference                    |
|-----------------------------|-------------------------|---------------------------------|------------------------------|
| ER $\alpha$ -E <sub>2</sub> | 19412                   | 8.0 millions                    | (Joseph <i>et al</i> , 2010) |
| ER $\alpha$ -vehicle        | 1990                    | 13.6 millions                   | (Joseph <i>et al</i> , 2010) |
| FOXA1-E <sub>2</sub>        | 15852                   | 13.5 millions                   | (Joseph <i>et al</i> , 2010) |
| FOXA1-vehicle               | 9337                    | 19.6 millions                   | (Joseph <i>et al</i> , 2010) |
| GATA3-E <sub>2</sub>        | 38530                   | 23.6 millions                   | This study                   |
| GATA3-vehicle               | 20707                   | 16.8 millions                   | This study                   |
| RNA pol II-E <sub>2</sub>   | Not applicable          | 7.6 millions                    | (Joseph <i>et al</i> , 2010) |
| RNA pol II-vehicle          | Not applicable          | 9.6 millions                    | (Joseph <i>et al</i> , 2010) |
| P300-E <sub>2</sub>         | Not applicable          | 12.8 millions                   | This study                   |
| P300-vehicle                | Not applicable          | 16.9 millions                   | This study                   |
| FAIRE-E <sub>2</sub>        | Not applicable          | 12.6 millions                   | (Joseph <i>et al</i> , 2010) |
| FAIRE-vehicle               | Not applicable          | 12.3 millions                   | (Joseph <i>et al</i> , 2010) |
| MCF-7 Input                 | Not applicable          | 9.3 millions                    | (Joseph <i>et al</i> , 2010) |

**Table II.** The Gene Ontology analysis (Pathway) for genes with ER $\alpha$ +FOXA1+GATA3 bindings as compared to genes with ER $\alpha$  unique, FOXA1 unique or GATA3 unique binding.

| Pathway                                                   | Genes with ER $\alpha$ +FOXA1+GATA3 overlapped peaks (p-value) | Genes with ER $\alpha$ unique peaks (p-value) | Genes with FOXA1 unique peaks (p-value) | Genes with GATA3 unique peaks (p-value) |
|-----------------------------------------------------------|----------------------------------------------------------------|-----------------------------------------------|-----------------------------------------|-----------------------------------------|
| PDGF signaling                                            | 1.41E-07                                                       | N.S.                                          | N.S.                                    | N.S.                                    |
| Heterotrimeric G-protein signaling                        | 3.92E-05                                                       | N.S.                                          | N.S.                                    | N.S.                                    |
| Inflammation mediated by chemokine and cytokine signaling | 2.81E-05                                                       | N.S.                                          | N.S.                                    | N.S.                                    |
| Histamine H1 receptor mediated signaling                  | 1.86E-05                                                       | N.S.                                          | N.S.                                    | N.S.                                    |

Note: N.S. means “not significant with p-value larger than 1E-04”



**Table III.** The Gene Ontology analysis (Molecular Function) for genes with ER $\alpha$ +FOXA1+GATA3 bindings as compared to genes with ER $\alpha$  unique, FOXA1 unique or GATA3 unique binding.

| Molecular Function                         | Genes with ER $\alpha$ +FOXA1+GATA3 overlapped peaks (p-value) | Genes with ER $\alpha$ unique peaks (p-value) | Genes with FOXA1 unique peaks (p-value) | Genes with GATA3 unique peaks (p-value) |
|--------------------------------------------|----------------------------------------------------------------|-----------------------------------------------|-----------------------------------------|-----------------------------------------|
| Protein binding                            | 1.59E-15                                                       | 3.90E-07                                      | N.S                                     | 7.29E-06                                |
| Small GTPase regular activity              | 6.29E-15                                                       | N.S                                           | N.S                                     | N.S                                     |
| Enzyme regulator activity                  | 2.51E-12                                                       | N.S                                           | N.S                                     | 1.55E-05                                |
| Catalytic activity                         | 7.68E-09                                                       | 5.30E-08                                      | N.S                                     | 3.13E-11                                |
| Guanyl-nucleotide exchange factor activity | 9.82E-09                                                       | N.S                                           | N.S                                     | N.S                                     |
| Binding                                    | 1.09E-08                                                       | N.S                                           | N.S                                     | 1.76E-06                                |
| Transporter activity                       | 6.08E-08                                                       | N.S                                           | N.S                                     | N.S                                     |
| Transmembrane transporter activity         | 1.23E-07                                                       | N.S                                           | N.S                                     | N.S                                     |
| Transferase activity                       | 7.96E-07                                                       | N.S                                           | N.S                                     | 3.37E-07                                |
| Kinase activity                            | 2.91E-06                                                       | N.S                                           | N.S                                     | 8.11E-05                                |
| Structural constituent of cytoskeleton     | 8.41E-06                                                       | N.S                                           | N.S                                     | N.S                                     |
| Calcium ion binding                        | 1.71E-05                                                       | N.S                                           | N.S                                     | N.S                                     |

Note: N.S. means “not significant with p-value larger than 1E-04”

**Table IV.** The list of antibodies used in this study.

| Antibody    | Catalog number | Supplier   |
|-------------|----------------|------------|
| ER $\alpha$ | Sc-543         | Santa-Cruz |
| FOXA1       | AB-4124        | Chemicon   |
| GATA3       | Sc-22205X      | Santa-Cruz |
| RNA pol II  | Ab-5408        | Abcam      |
| p300        | Sc-584X        | Santa-Cruz |

**Table V.** List of primers used in the Re-ChIP experiments to investigate the co-occupancy of ER $\alpha$ +FOXA1 and ER $\alpha$ +GATA3 to the target sites.

| No | Name     | Sequence                                              |
|----|----------|-------------------------------------------------------|
| 1  | GPR37L1  | TAACCCTCCTCTTTGGCTCTG<br>CTAGCCATGTCCTTTCTGCC         |
| 2  | GREB1    | GGCTCCAGTCCAAGTACACAACTTC<br>TTTTGCTGGGTCACAGTGCTCTCC |
| 3  | ITPK1    | CTGCCTGCAATCTGTTCCATAC<br>TCAGGTGACGCTGACTGTTG        |
| 4  | LRRN6A   | GTTTGCTGACCAAACACTAGGAAGT<br>CCCACGGAAGCTTAGCTTTA     |
| 5  | SLC25A25 | GCTTTTCCTGTGGAGGCTTC<br>TGGTAGGTACTIONCGCAAACC        |
| 6  | RAD51L1  | GTAACAGAACAGGCTGTGCC<br>CAAACAGATGCAAGACAAGG          |
| 7  | PRKCBP1  | GAAGGAACCAAGAGGAAGGAG<br>CCCTGTTTACCTTTGTTTCC         |

**Table VI.** List of primers used to study the progressive recruitment of ER $\alpha$  and FOXA1 in synchronized MCF-7 cells.

| No | Name     | Sequence                                                 |
|----|----------|----------------------------------------------------------|
| 1  | GPR37L1  | TCTCTGGCAGCTTGTGTCAG<br>GGCCACGACAAACAGATTAT             |
| 2  | KIAA0649 | GTGCTTCCTAGCTTTTCTAATGCAGC<br>ATGAGAGCAGAGCAGTTGGGAGCTTC |
| 3  | SLC25A25 | TTCTGAGGTTGCTCCAGCCT<br>TGAACCTGGTAGGTACTIONCGG          |
| 4  | DNPEPP   | ACAGGGCTGTTTACTTTTCAG<br>CCCTGGAACTTCATAGACAT            |
| 5  | RPLP1    | AGCTTCCTGTTCTGCTGCCGGTTATC<br>TTTGACGCTAACACTGGTG        |

**Table VII.** List of primers used for the validation of FOXA1 and GATA3 binding sites by ChIP-qPCR. The coordinates (in hg18) for the binding sites represent the genomic site at the center of the peak (submitted as separate Excel file).

**Table VIII.** The list of E<sub>2</sub> up-regulated genes at 3, 6, 9, 12, 24 and 48 hours identified in MCF-7 cells with the ER $\alpha$ , FOXA1, GATA3, RNA Pol II bindings support information (submitted as separate Excel file).

**Table IX.** The list of E<sub>2</sub> down-regulated genes at 3, 6, 9, 12, 24 and 48 hours identified in MCF-7 cells with the ER $\alpha$ , FOXA1, GATA3, RNA Pol II bindings support information (submitted as separate Excel file).

**Table X.** The list of all the E<sub>2</sub>-regulated genes as well as the cell cycle, cellular proliferation and DNA replication genes in the transfected MDA-MB-231 cells compare to MCF-7 cells (submitted as separate file).

**Table XI.** The list of previously known E<sub>2</sub>-responsive genes identified by Frasor *et al* that regulate in the same direction in the transfected MDA-MB-231-ER+FOXA1+GATA3 cells (submitted as separate Excel file).

**Table XII.** The expression of luminal and basal cassette in the MCF-7 and MDA-MB-231 transfectants (submitted as separate Excel file).

**Table XIII.** The presence of ER $\alpha$ , FOXA1 and GATA3 binding support within 20kb of TSS of the luminal and basal marker genes defined by Kao *et al*. (submitted as separate Excel file).

## REFERENCES

Frasor J., Danes J. M., Komm B., Chang K. C. N., Lyttle R., Katzenellenbogen BS (2003) Profiling of estrogen up- and down-regulated gene expression in human breast cancer cells: insights into gene networks and pathways underlying estrogenic control of proliferation and cell phenotype. *Endocrinology* **144**: 4562-4574.

Joseph R, Orlov YL, Huss M, Sun W, Kong SL, Ukil L, Pan YF, Li G, Lim M, Thomsen JS, Ruan Y, Clarke ND, Prabhakar S, Cheung E, Liu ET (2010) Integrative model of genomic factors for determining binding site selection by estrogen receptor  $\alpha$ . *Mol System Biol* **6**:456.

Kao J, Salari K, Bocanegra M, Choi YL, Girard L, Gandhi J, Kwei KA, Hernandez-Boussard T, Wang P, Gazdar AF, Minna JD, Pollack JR (2009) Molecular profiling of breast cancer cell lines

defines relevant tumor models and provides a resource for cancer gene discovery. *PLoS One* **4**: e6146.

Yu Q., He M., Lee N.M., E.T. L (2002) identification of myc-mediated death response pathways by microarray analysis. *journal of biological chemistry* **277**: 13059-13066.

Figure S1. The validation of (A) FOXA1 and (B) GATA3 bindings on randomly selected sites with different binding intensity by ChIP-qPCR. A few non-binding sites are included as negative control. The error bars show the standard errors of the means of binding enrichments from three replicates. (C) The scatter plots on the correlation between FOXA1 and GATA3 peak intensity measured by ChIP-seq after normalization to input control and binding enrichment assayed by qPCR.

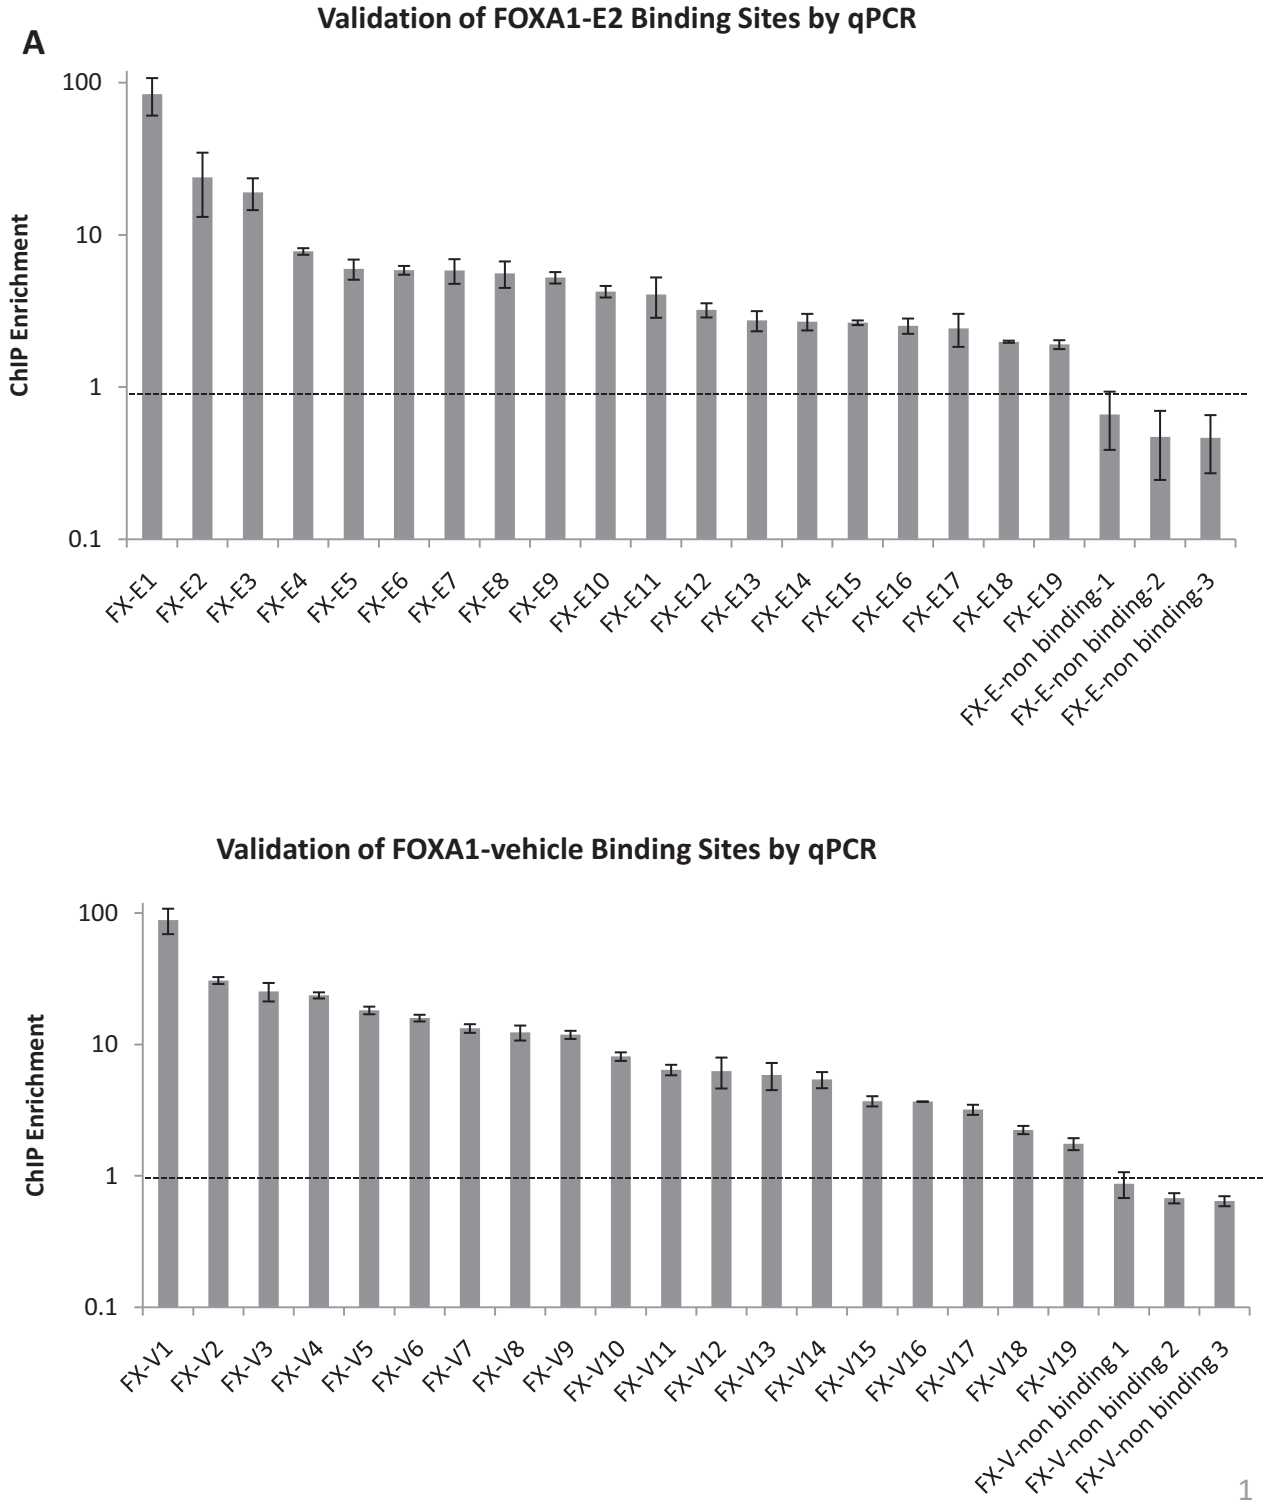

**B****Validation of GATA3-E2 Binding Sites by qPCR**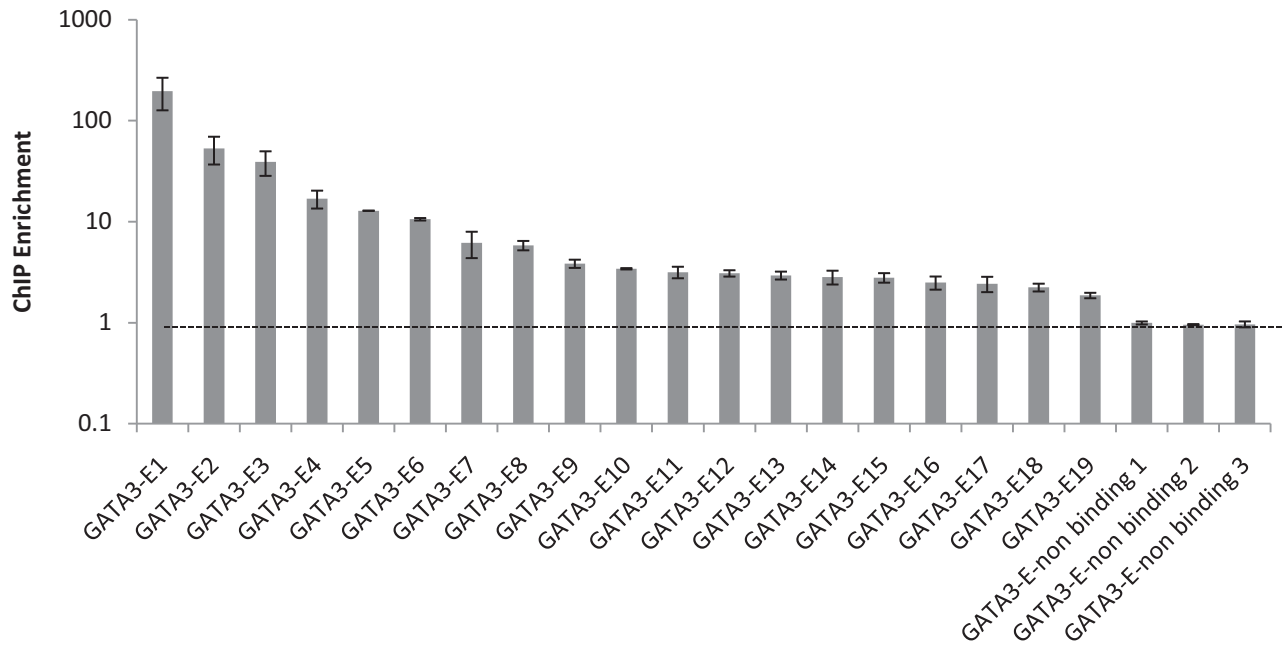**Validation of GATA3-vehicle Binding Sites by qPCR**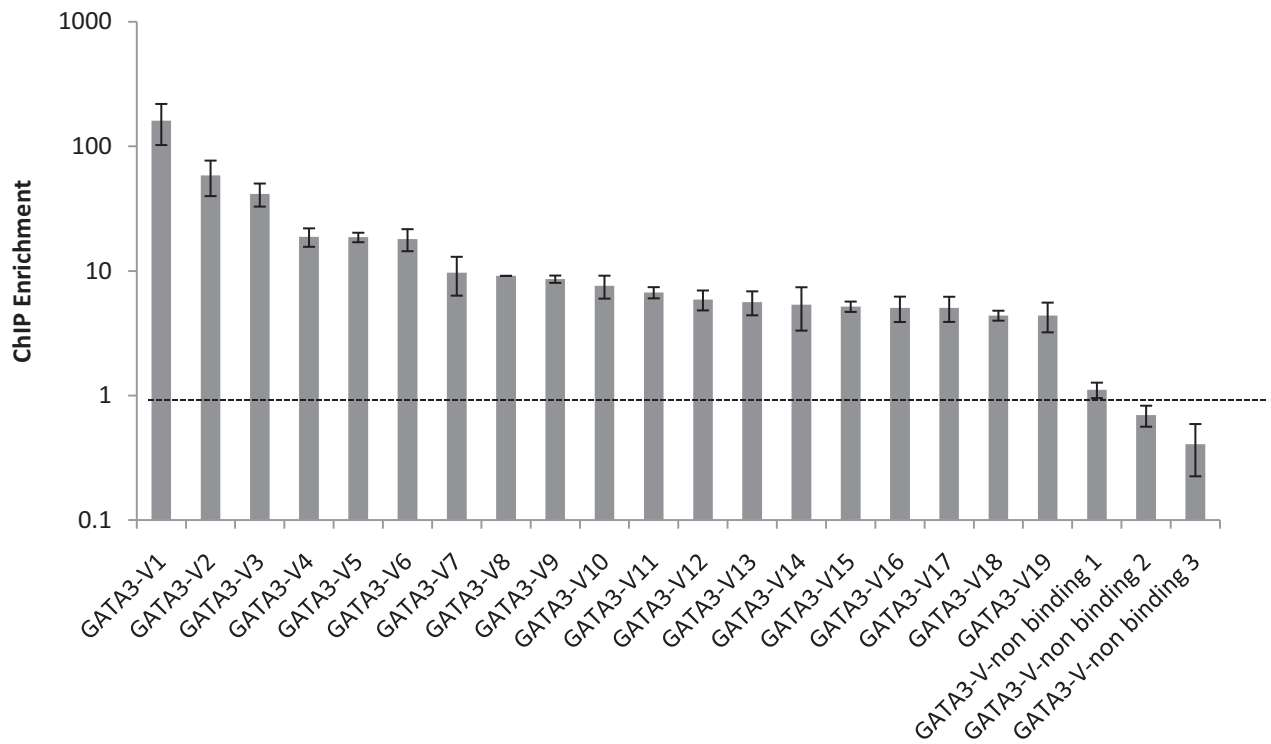

C

**The Correlation Between FOXA1-E2 Binding Intensity with qPCR Enrichment**

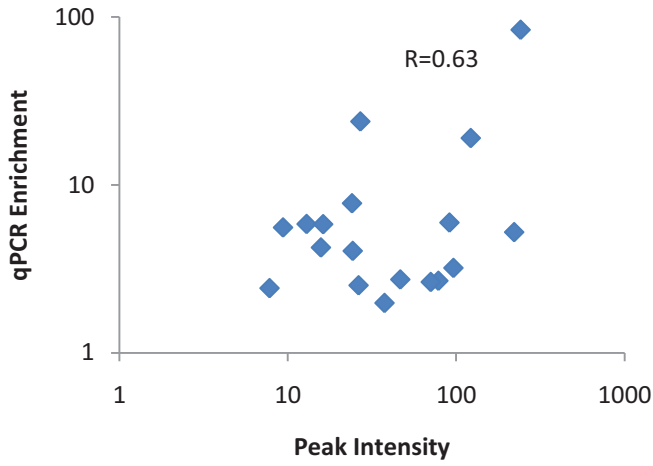

**The Correlation Between GATA3-vehicle Binding Intensity with qPCR Enrichment**

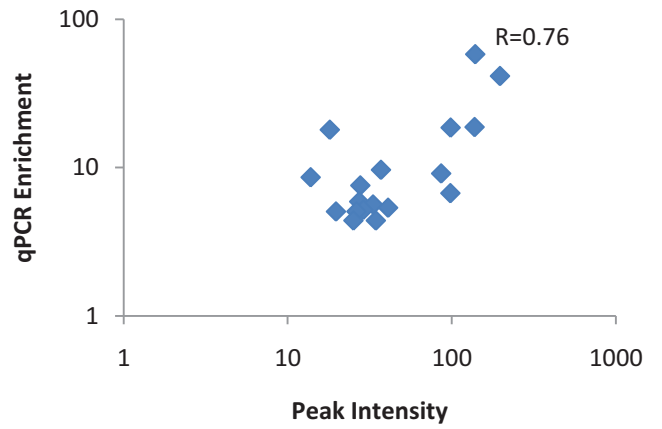

**The Correlation between GATA3-E2 Binding Intensity with qPCR Enrichment**

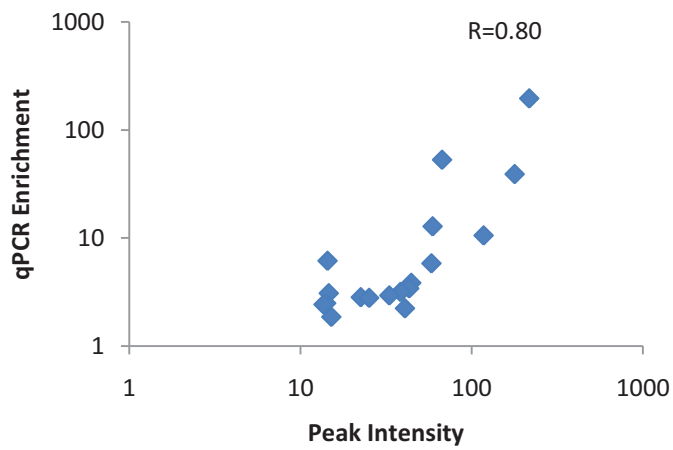

**The Correlation Between FOXA1-vehicle Binding Intensity with qPCR Enrichment**

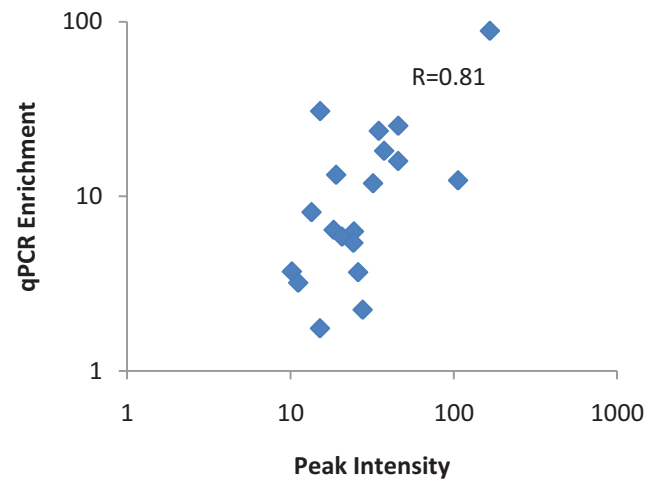

Figure S2. The correlation of ER peaks intensity with (A) FOXA1 and (B) GATA3 peaks intensity. The peak intensities are in log10 scale.

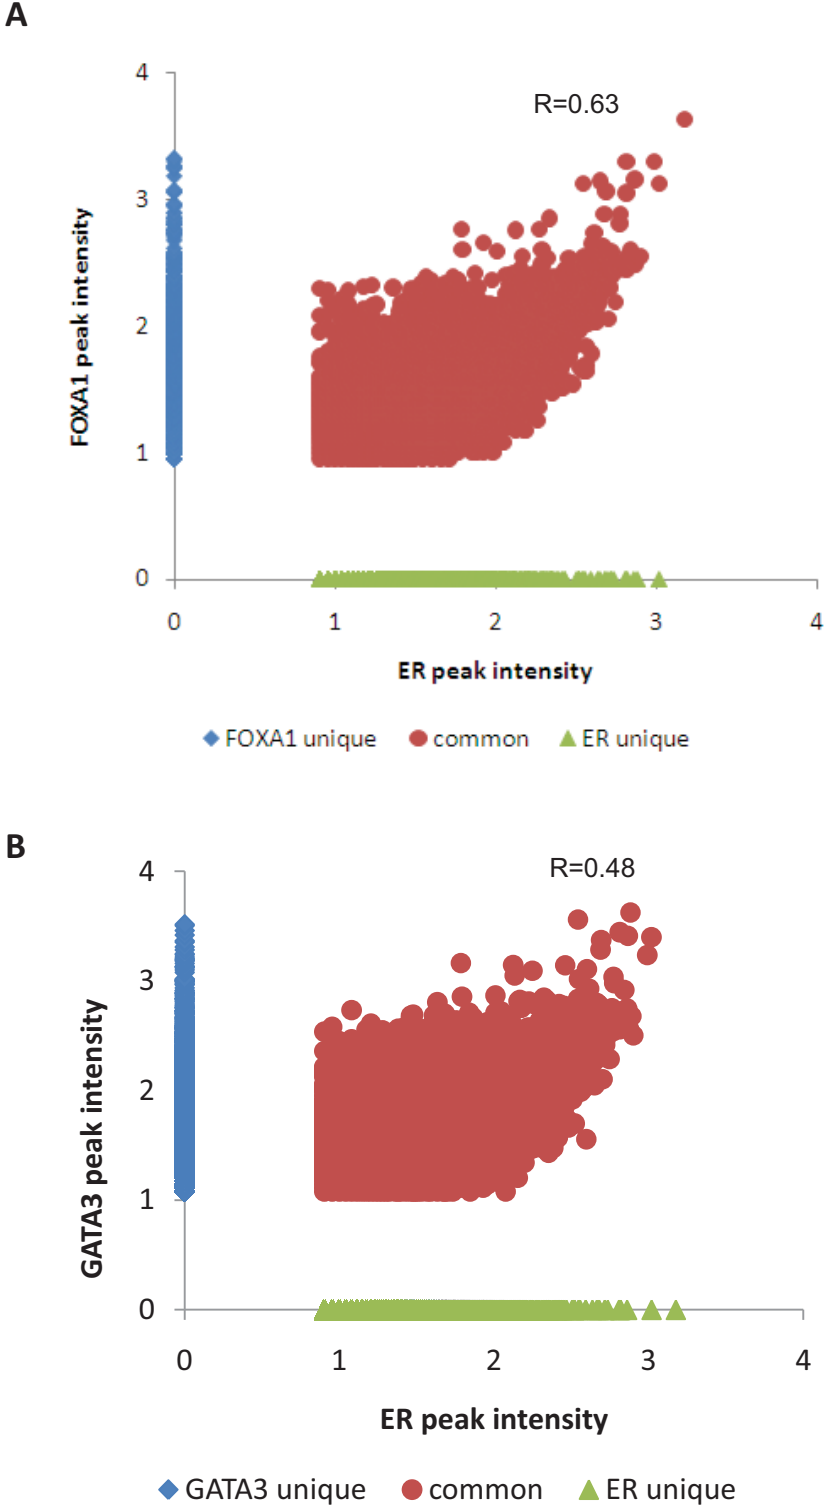



Figure S3. The tabulation of ER $\alpha$  unique, ER $\alpha$ +GATA3, ER $\alpha$ +FOXA1, ER $\alpha$ +FOXA1+GATA3 sites with the (A) ER $\alpha$  occupancy (B) FOXA1 occupancy, (C) GATA3 occupancy, (D) p300 recruitment, (E) RNA Pol II recruitment and (F) chromatin opening measured by FAIRE in before and after E<sub>2</sub> stimulation.

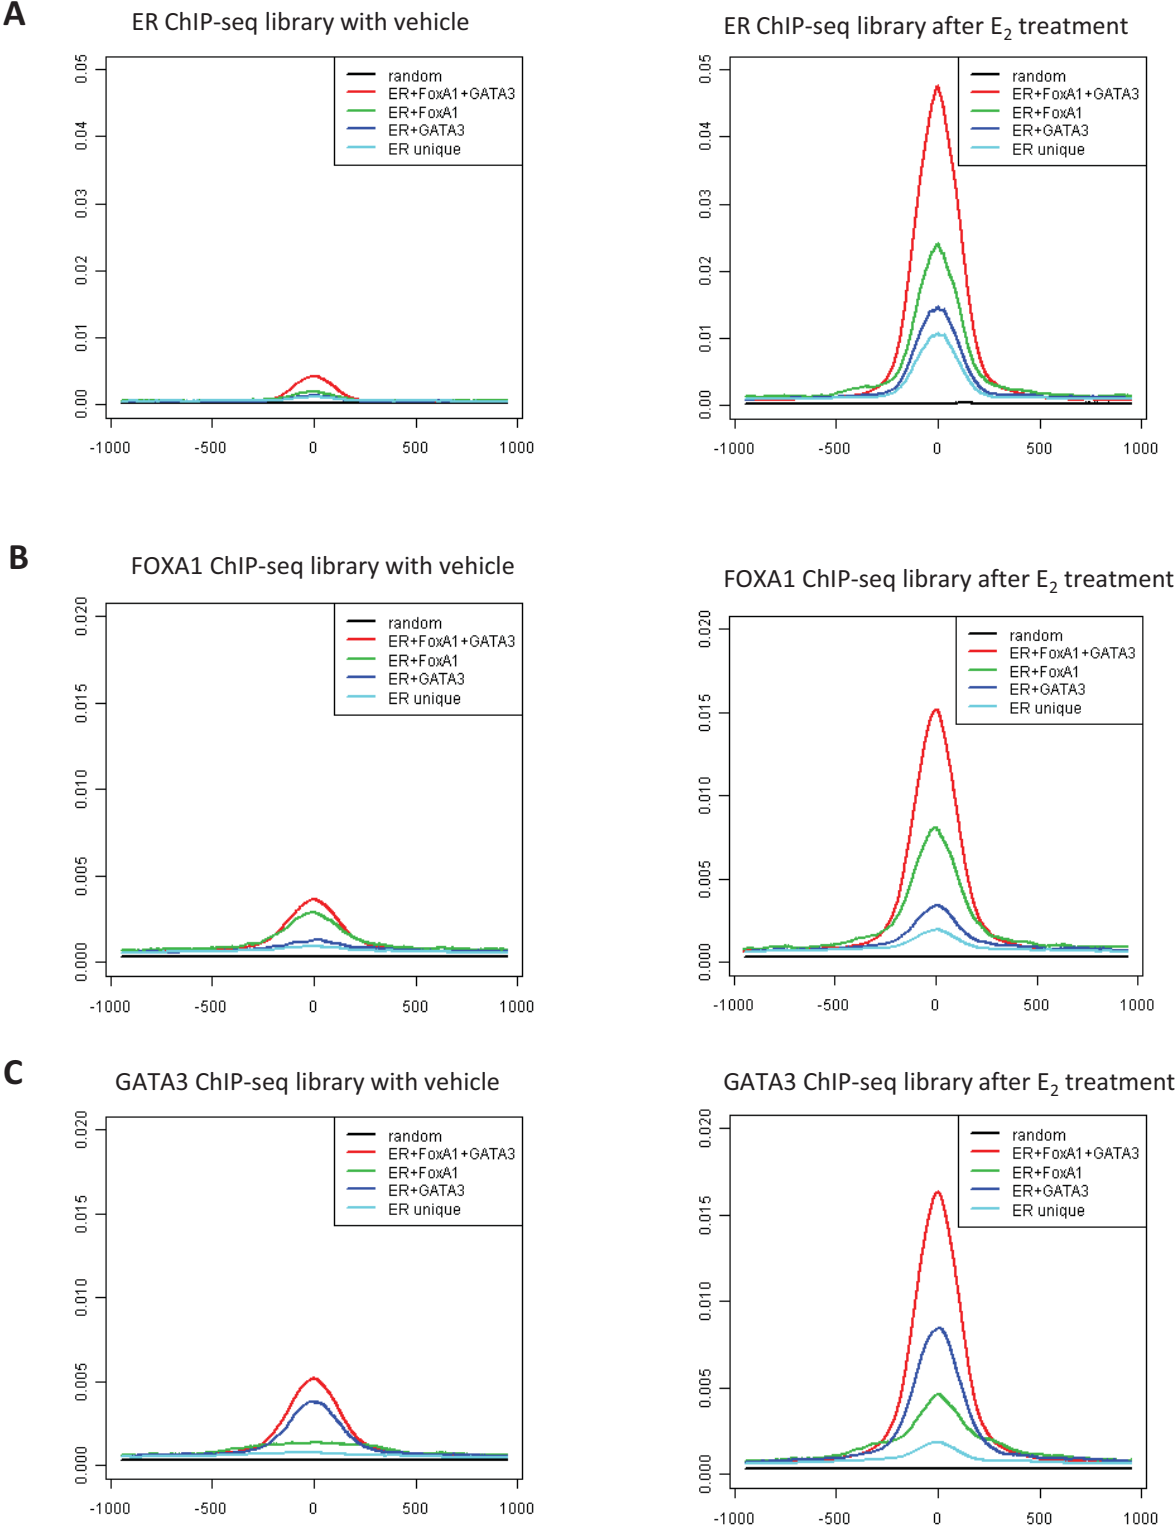

**D**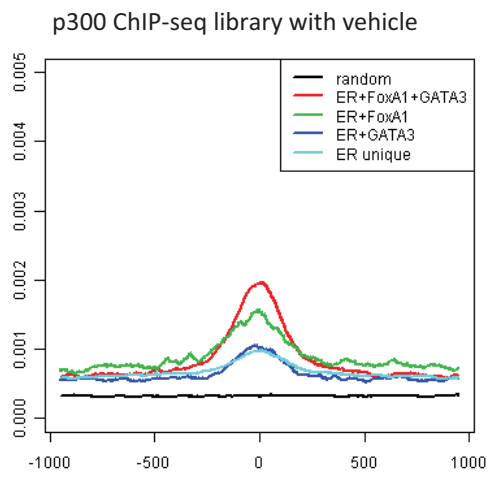

p300 ChIP-seq library after E<sub>2</sub> treatment

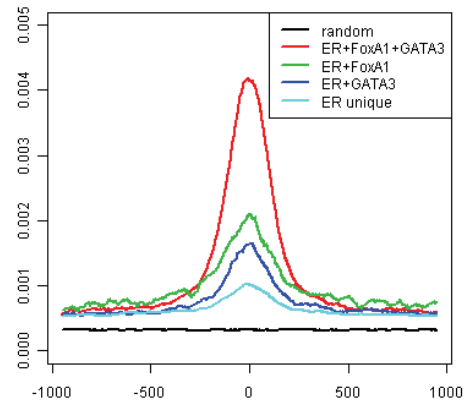**E**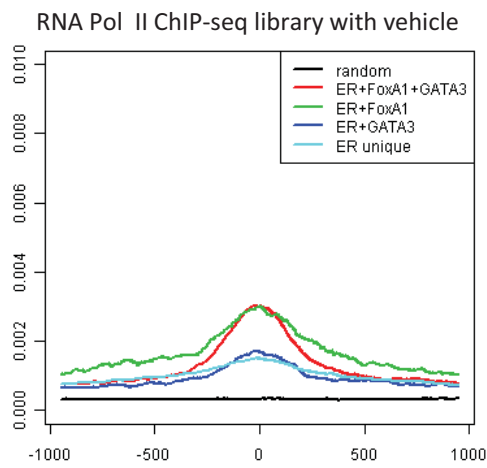

RNA Pol II ChIP-seq library after E<sub>2</sub> treatment

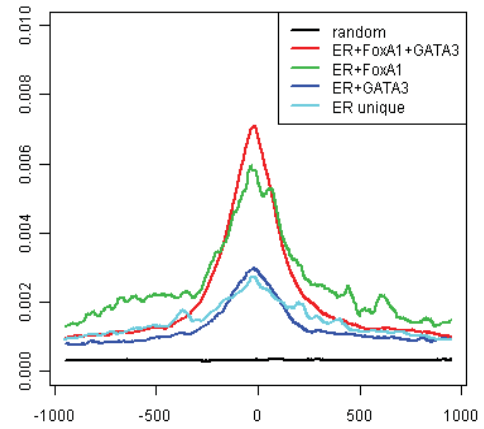**F**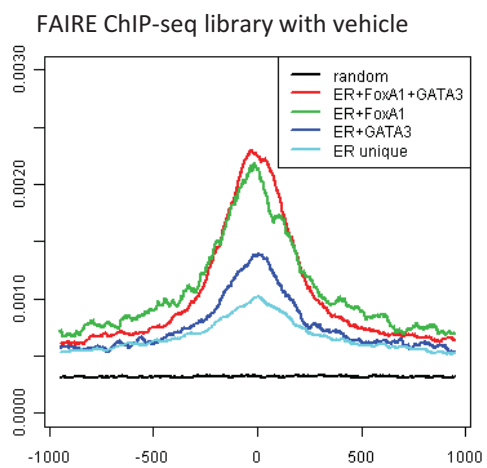

FAIRE ChIP-seq library after E<sub>2</sub> treatment

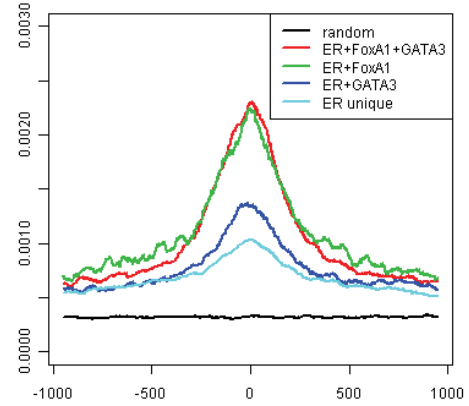

Figure S4. (A) The distribution of enhanceosome consists of ER $\alpha$ +FOXA1+GATA3 in the ~19k ER $\alpha$  binding sites in MCF-7 cells. Majority of the enhanceosomes were found in the top quartile ER $\alpha$  binding sites with the highest binding intensity. (B) The comparison between enhanceosome (red) vs non-enhanceosome (green) from the top quartile ER $\alpha$  sites with the occupancy of ER $\alpha$ , FOXA1 and GATA3; (C) p300 recruitment and (D) RNA pol II recruitment.

**A** Distribution of ER+GATA3+FOXA1 overlap sites in different quartiles of ER sites

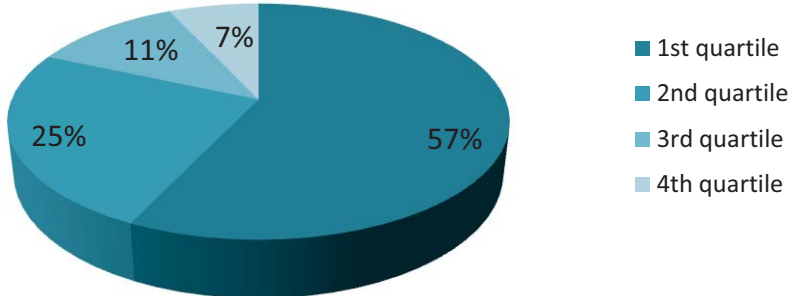

**B**

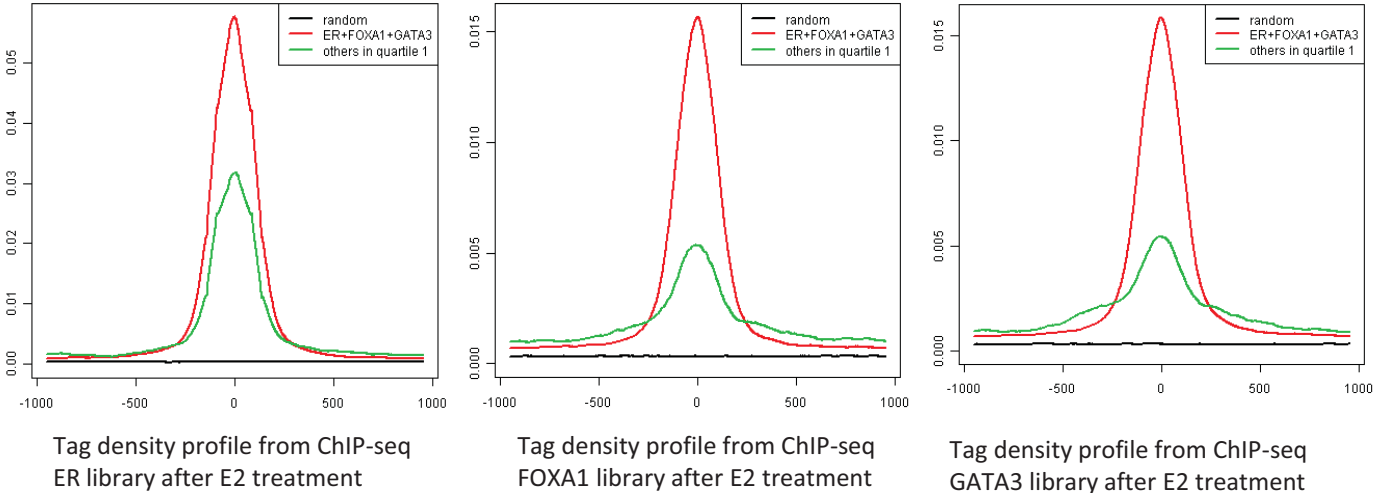

**C**

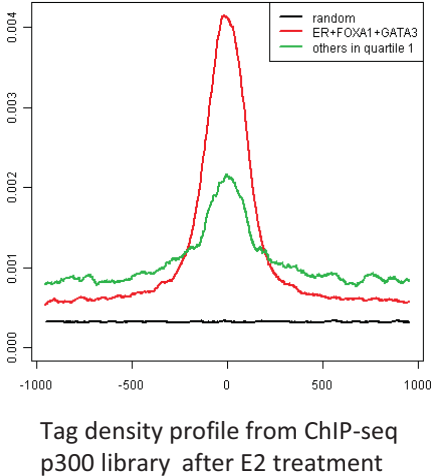

**D**

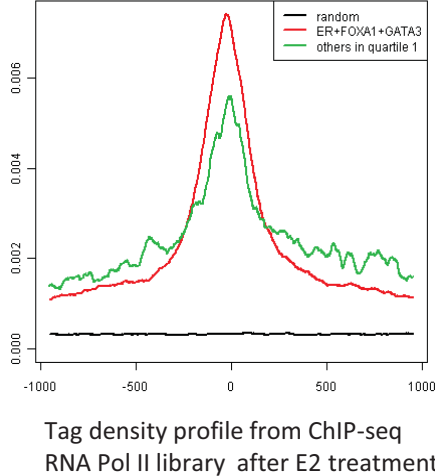

Figure S5. Majority of the ER $\alpha$  interactomes display ER $\alpha$ +FOXA1+GATA3 co-localization. (A) The distribution of simple/ duplex ChIA-PET interaction clusters with ER $\alpha$ +FOXA1+GATA3 conjoint bindings. (B) An example of duplex interaction is shown. (C) The complex ChIA-PET interaction clusters with ER $\alpha$ +FOXA1+GATA3 conjoint bindings. We found that the enhanceosome has better association with complex ER $\alpha$  interactome, indicating that interactome of higher complexity requires multiple TFs. (D) An example of complex interaction is shown. (E) An example of E<sub>2</sub>-regulated gene with complex ER $\alpha$  interactome was shown to have co-localization of ER $\alpha$ , FOXA1 and GATA3 bindings.

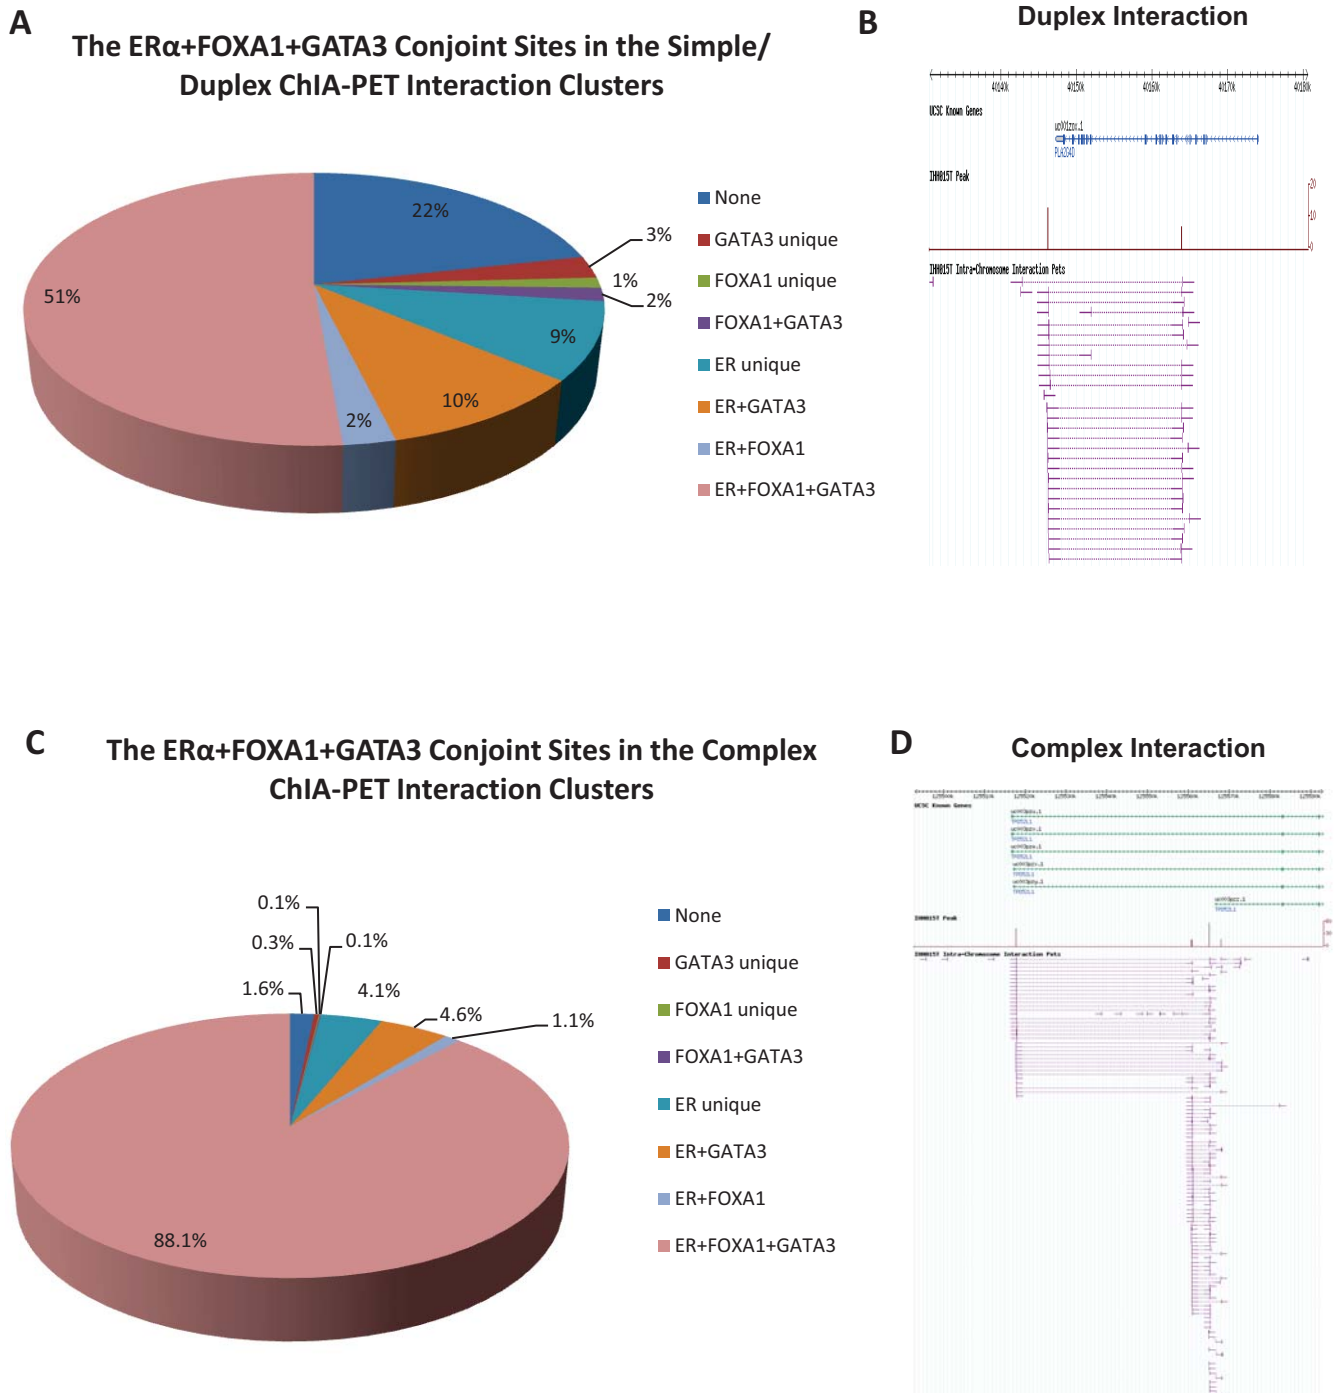

E

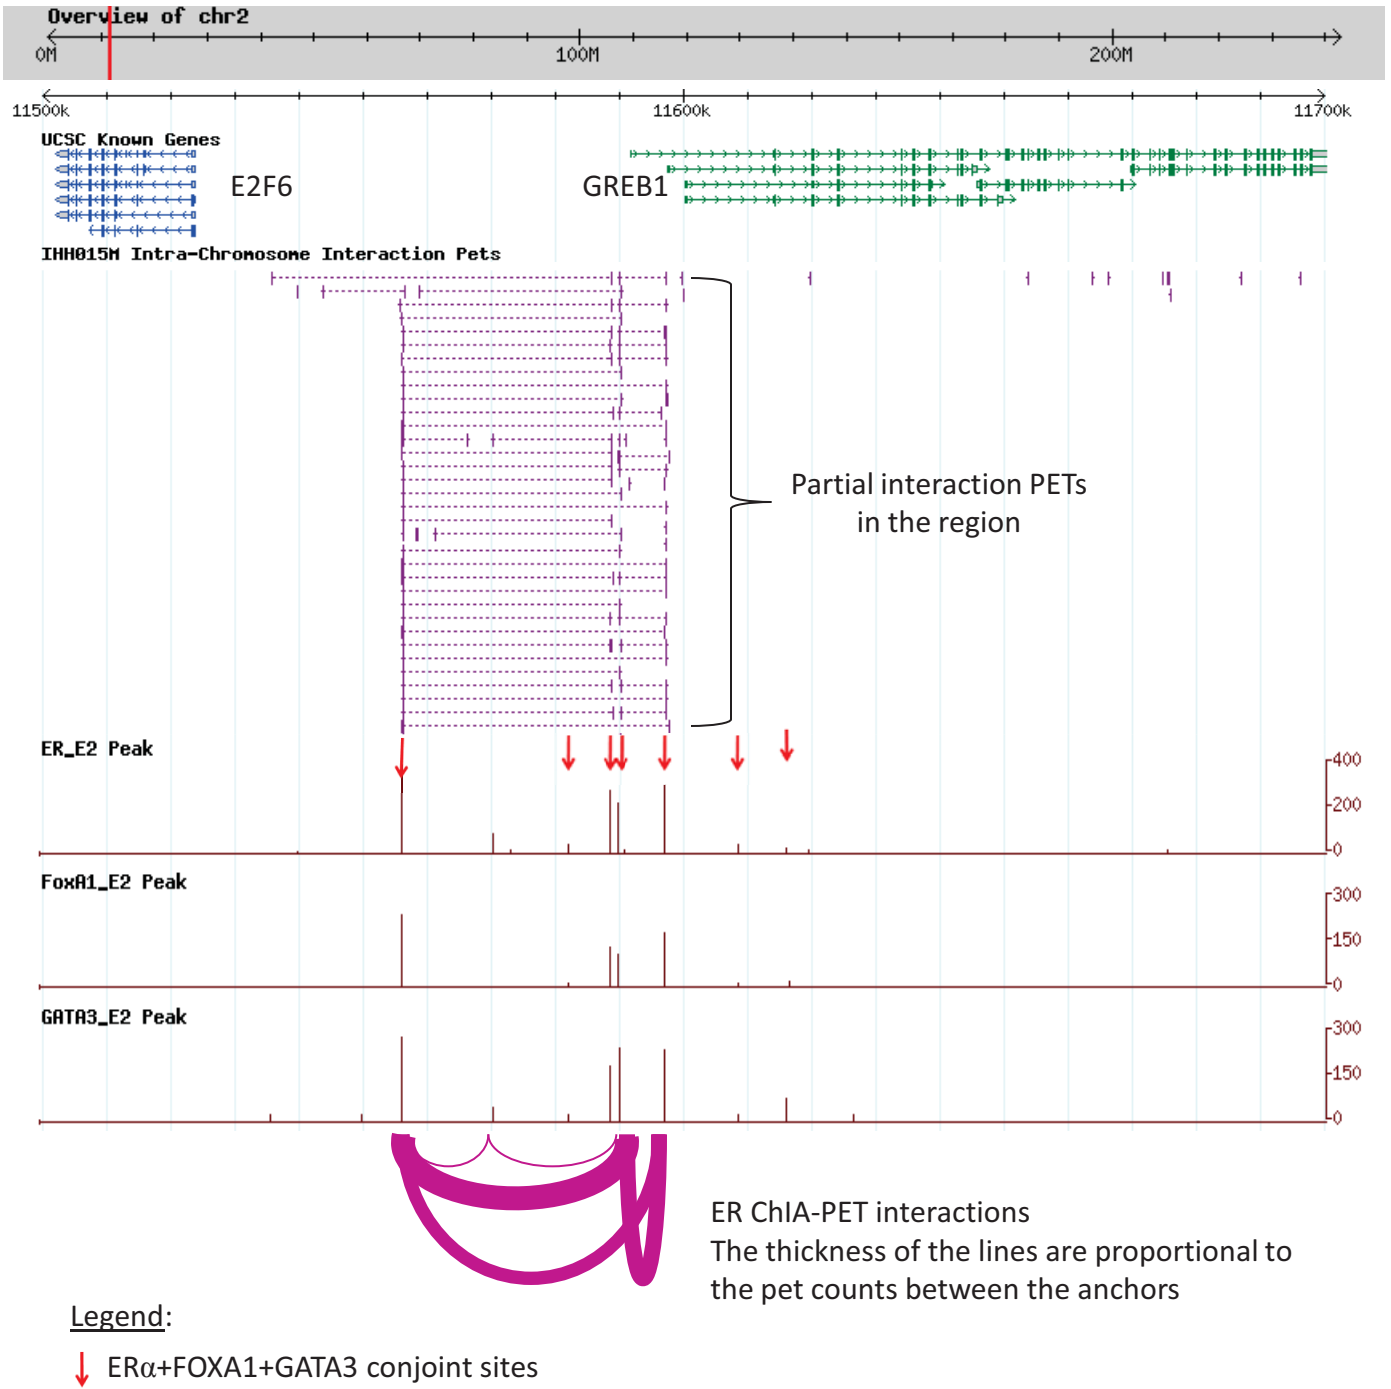

Supplemental Figure S6.(A) The expression of ER $\alpha$ , GATA3 and FOXA1 in ER $\alpha$ -positive MCF-7 cells and ER $\alpha$ -negative MDA-MB-231 and BT-549 cells prior to transfection experiment. (B) The expression of ER $\alpha$ , GATA3 and FOXA1 in the transfected MDA-MB-231 and BT-549 cells with various TF combination.

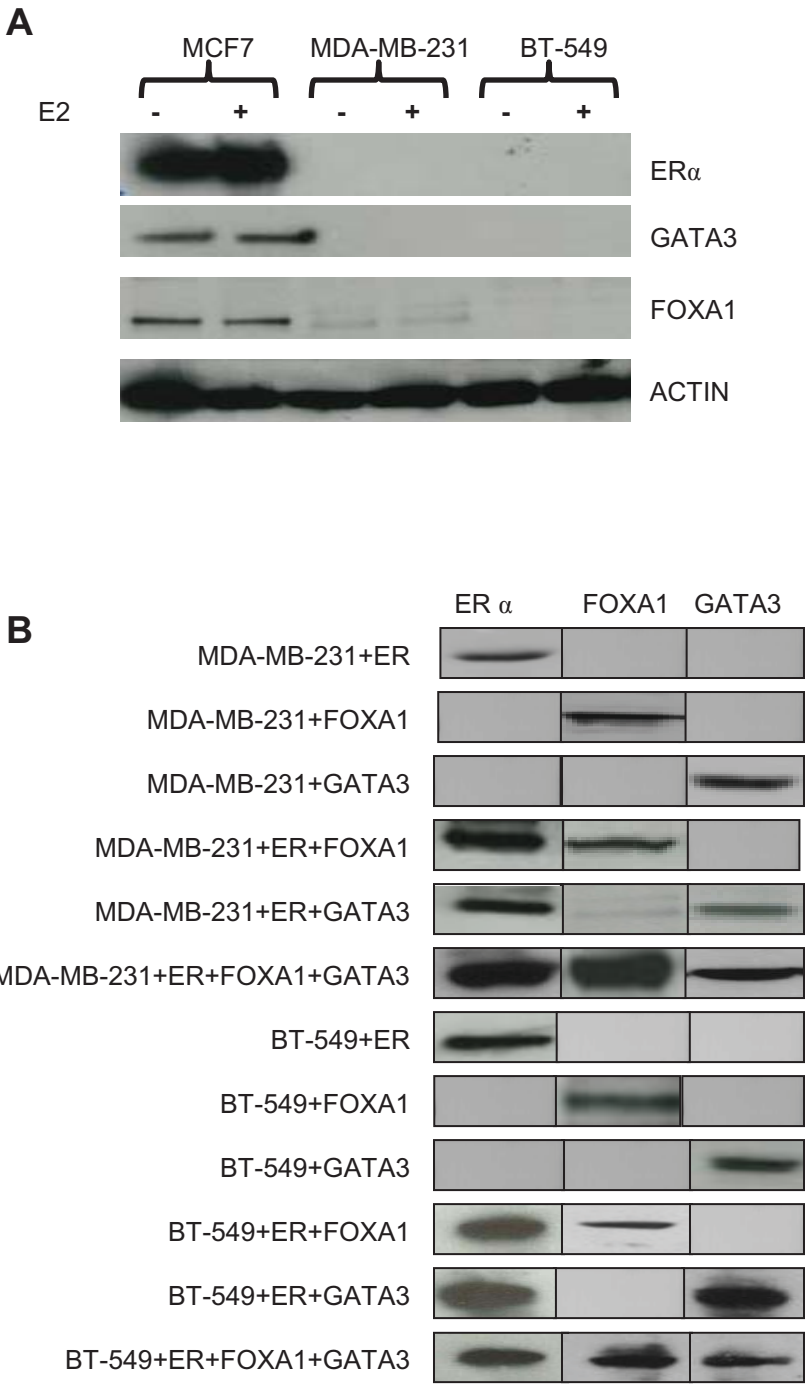

Figure S7. The proliferation of reprogrammed MDA-MB-231 cells assayed by WST-1. (A) The subtle inhibited growth of MDA-MB-231 cells with the transfection of ER $\alpha$ . (B) The inhibited growth of MDA-MB-231 cells with the transfection of FOXA1. (C) The unaltered growth of MDA-MB-231 cells with the transfection of GATA3. (D) The inhibited growth of MDA-MB-231 cells with co-transfection of ER $\alpha$ +FOXA1. (E) The unaltered growth of MDA-MB-231 cells with co-transfection of ER $\alpha$ +GATA3. (F) The induced cell proliferation in response to E2 stimulation in the MDA-MB-231 cells with the co-transfection of ER $\alpha$ , FOXA1 and GATA3 in combination. For every sub-figures, means and standard errors of three independent experiments are shown.

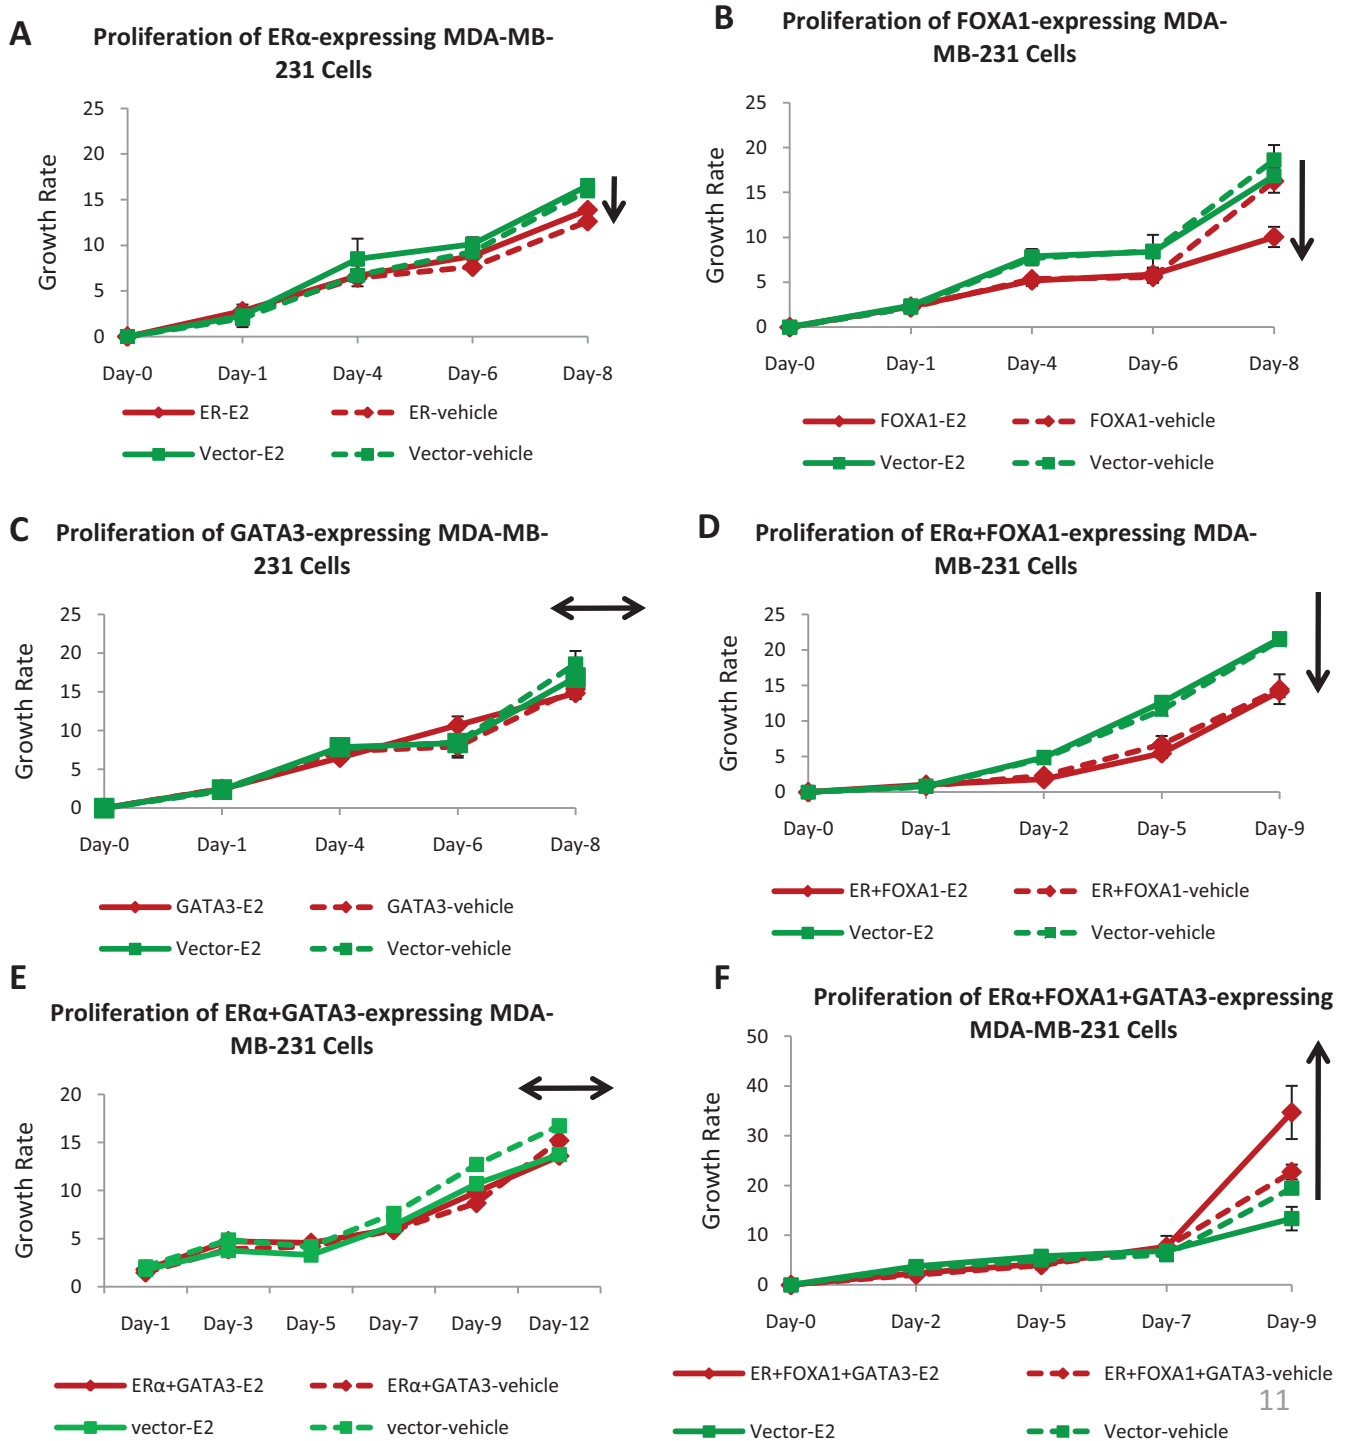

Figure S8. The proliferation of reprogrammed MDA-MB-231 cells assessed by cell number count using Hoechst stain. (A) The subtle inhibited growth of MDA-MB-231 cells with the transfection of ER $\alpha$ . (B) The inhibited growth of MDA-MB-231 cells with the transfection of FOXA1. (C) The unaltered growth of MDA-MB-231 cells with the transfection of GATA3. (D) The unaltered growth of MDA-MB-231 cells with co-transfection of ER $\alpha$ +FOXA1. (E) The inhibited growth of MDA-MB-231 cells with co-transfection of ER $\alpha$ +GATA3. (F) The induced cell proliferation in response to E2 stimulation in the MDA-MB-231 cells with the co-transfection of ER $\alpha$ , FOXA1 and GATA3 in combination. For every sub-figures, means and standard errors of three independent experiments are shown.

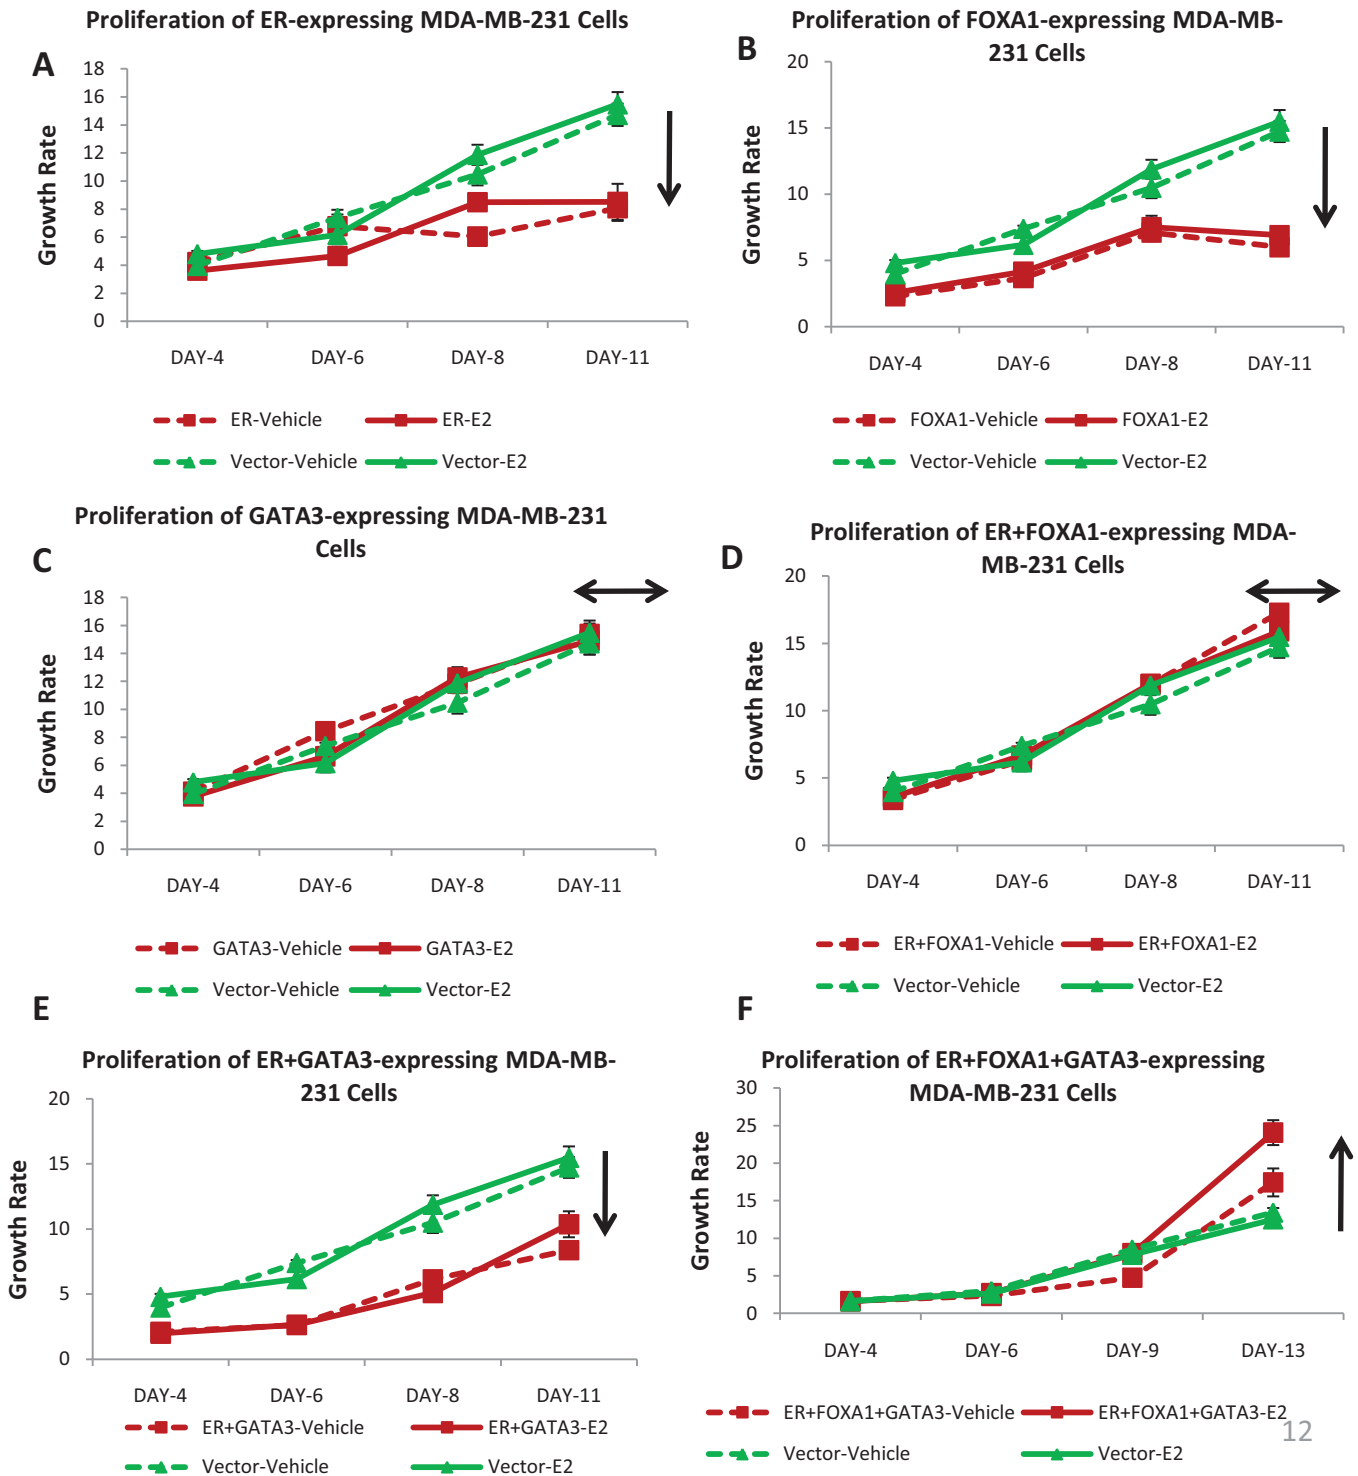



Figure S9. Recapitulating the reprogramming work in another ER $\alpha$ -negative BT-549 cell line. (A) The inhibited growth of BT-549 cells with the transfection of ER $\alpha$ . (B) The inhibited growth of BT-549 cells with the transfection of FOXA1. (C) The subtle induced growth of BT-549 cells with the transfection of GATA3. (D) The unaltered growth of BT-549 cells with co-transfection of ER $\alpha$ +FOXA1. (E) The unaltered growth of BT-549 cells with co-transfection of ER $\alpha$ +GATA3. (F) The induced cell proliferation in response to E2 stimulation in the BT-549 cells with the co-transfection of ER $\alpha$ , FOXA1 and GATA3 in combination. For every sub-figures, means and standard errors of three independent experiments are shown.

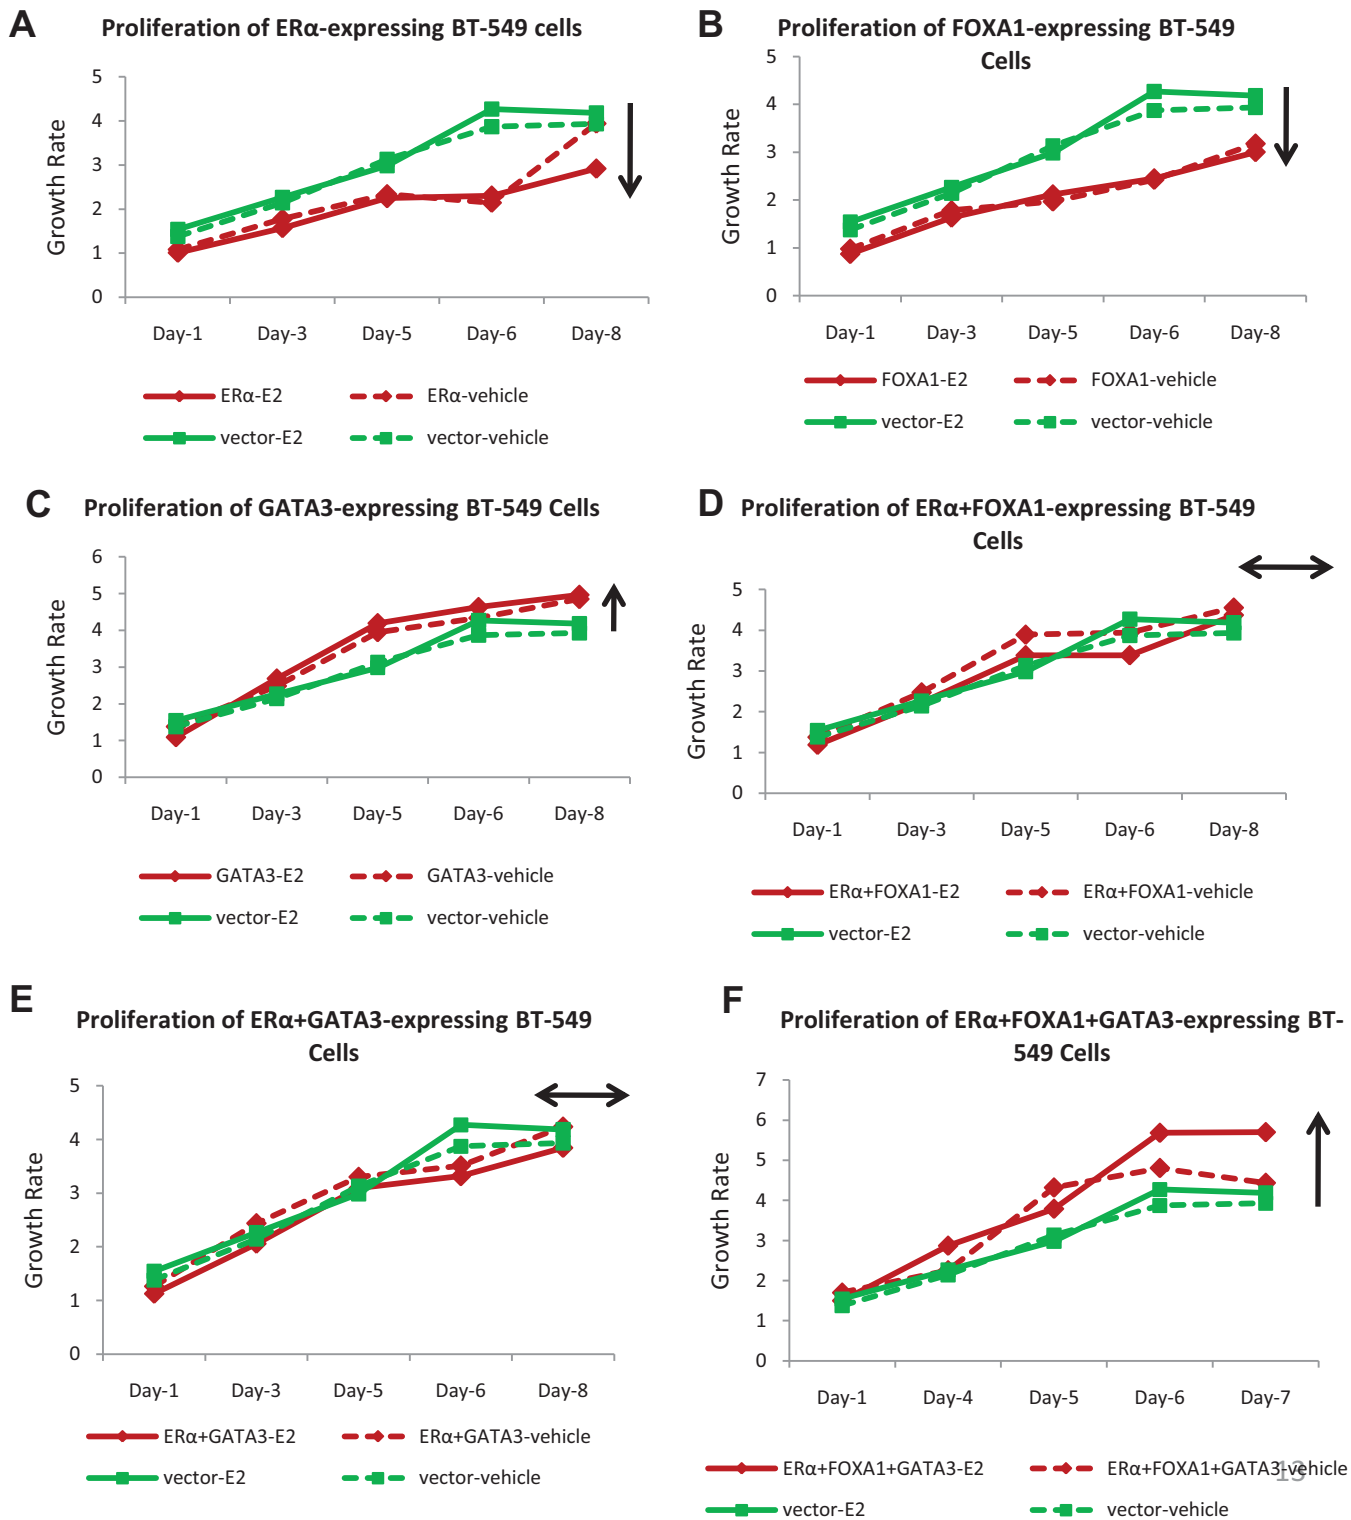

Figure S10. The proliferation of reprogrammed BT-549 cells assessed by cell number count using Hoechst stain. (A) The subtle inhibited growth of BT-549 cells with the transfection of ER $\alpha$ . (B) The inhibited growth of BT-549 cells with the transfection of FOXA1. (C) The marginal induced growth of BT-549 cells with the transfection of GATA3. (D) The inhibited growth of BT-549 cells with co-transfection of ER $\alpha$ +FOXA1. (E) The inhibited growth of BT-549 cells with co-transfection of ER $\alpha$ +GATA3. (F) The induced cell proliferation in response to E2 stimulation in the BT-549 cells with the co-transfection of ER $\alpha$ , FOXA1 and GATA3 in combination. For every sub-figures, means and standard errors of three independent experiments are shown.

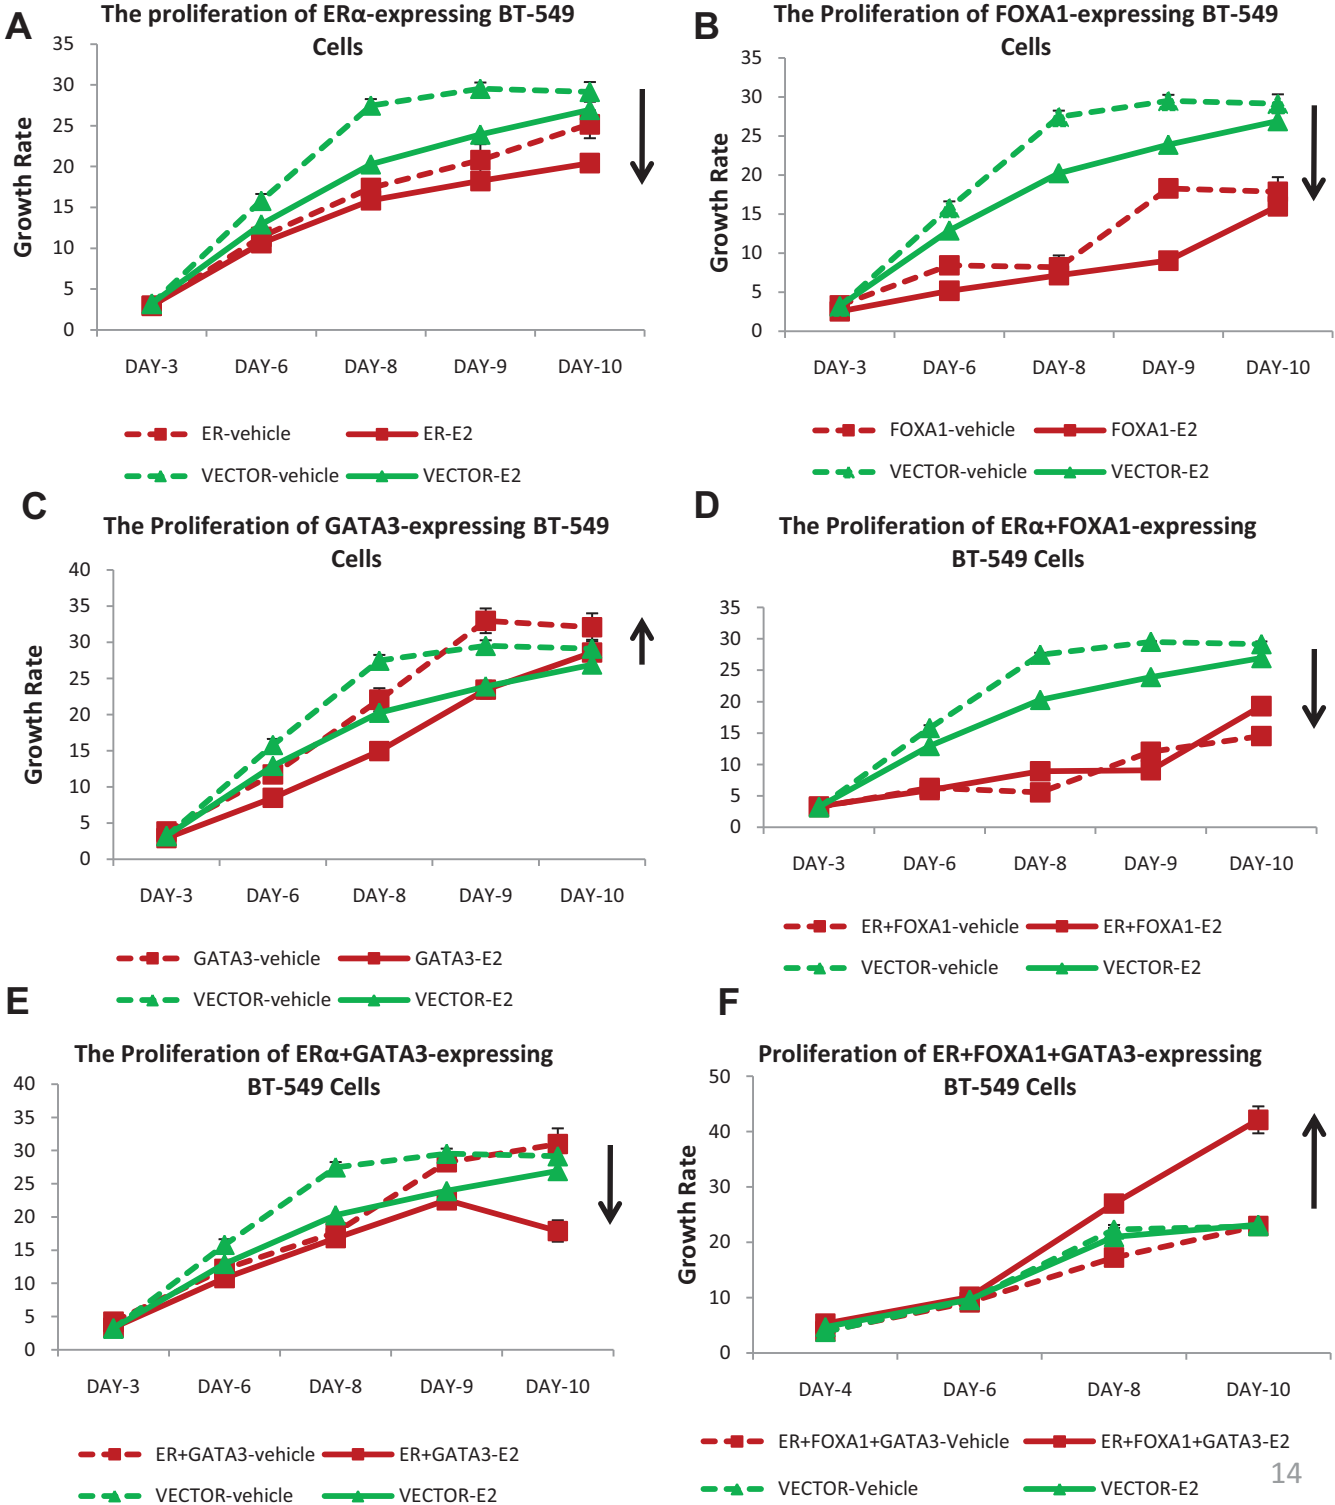

Figure S11. (A) The growth of MDA-MB-231 cells transfected with different combinations of TFs relative to the vehicle-treated MDA-MB-231 vector control cells at the final day of growth assessment by cell number count. (B) The recapitulation of reprogramming work in another ER $\alpha$ -negative BT-549 cells. The growth of BT-549 cells transfected with different combinations of TFs relative to the vehicle-treated BT-549 vector control cells at the final day of growth assessment by cell number count. For every sub-figures, means and standard errors of three independent experiments are shown.

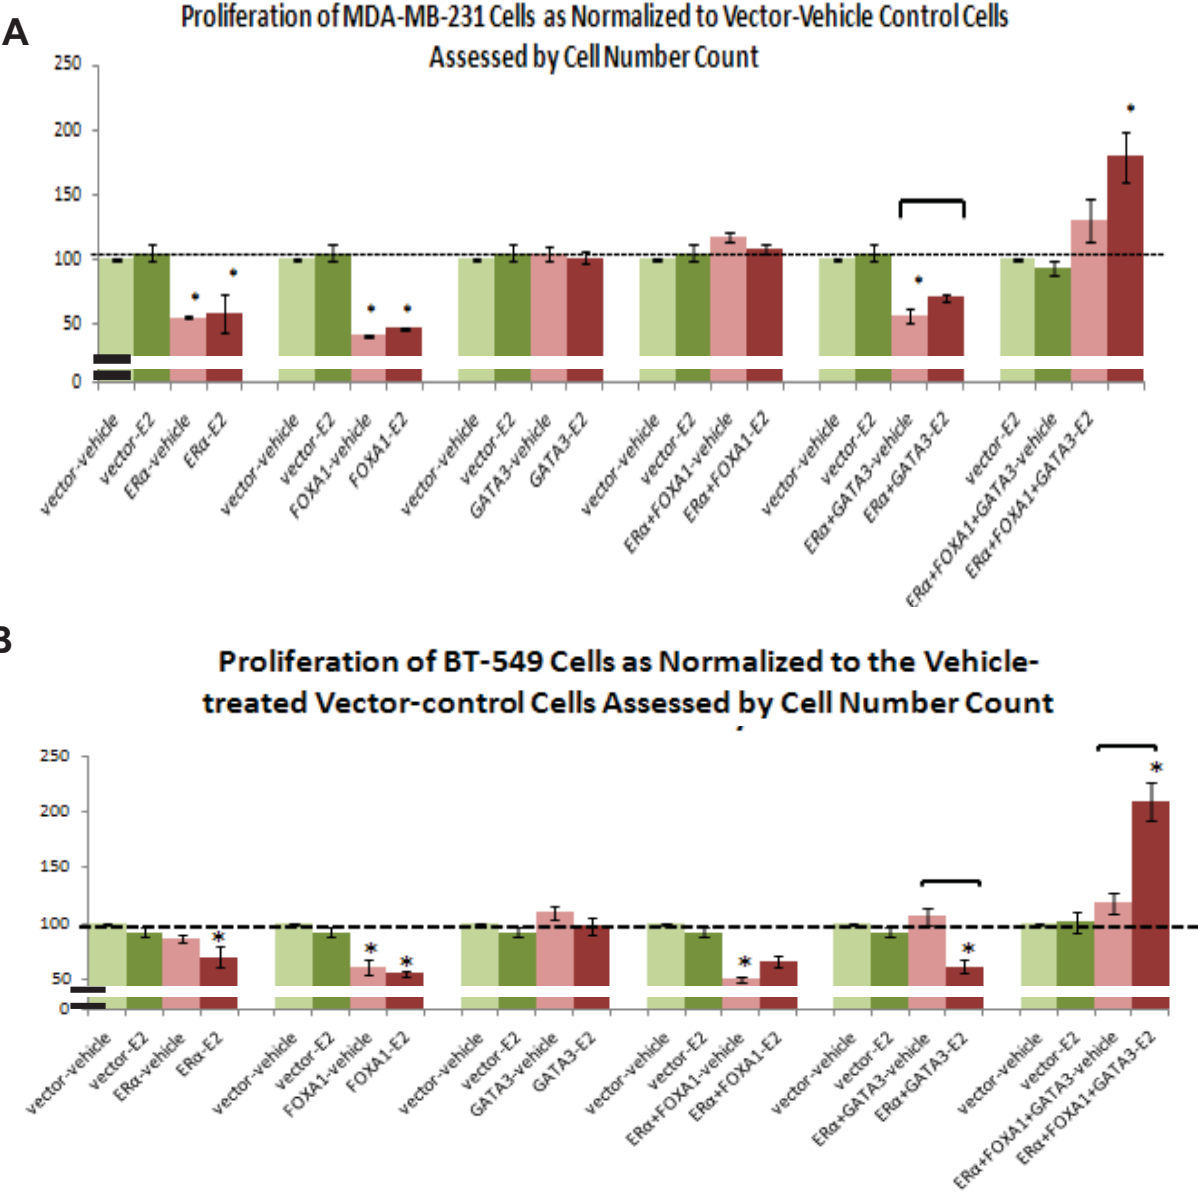

**Note:** \* means p-value  $\leq 0.05$  compared to vector-vehicle computed from the Student's t Test  
 — shows significant E2-dependent induced or repressed growth with p-value  $\leq 0.05$

Figure S12. The correlation of the expression profile of cell cycle, cellular proliferation and DNA replication genes between the MCF-7 cells and the MDA-MB-231 cells transfected with (A) ER $\alpha$ -only, and (B) ER $\alpha$ +FOXA1+GATA3. We observed that there was positive correlation between MDA-MB-231 cells transfected with ER $\alpha$ +FOXA1+GATA3 and MCF-7 cells, no correlation between the ER-only MDA-MB-231 cells and MCF-7 cells. The p-value for the differences between the two correlation coefficient stated in (A) and (B) is  $\leq 0.0034$ .

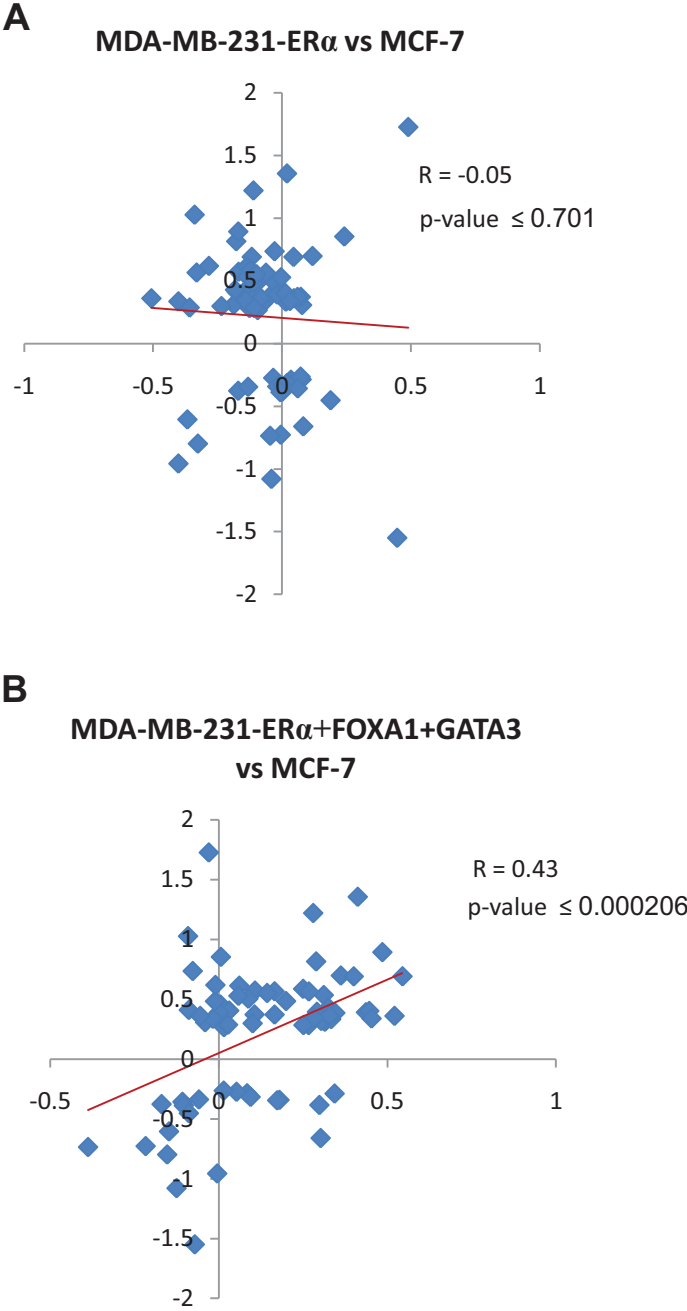

Figure S13. The Ingenuity Pathway Analysis was used to assess the functionality of estrogen responsive genes identified in MDA-MB-231 transfectant cells. (A) The estrogen regulated genes identified in the transfected MDA-MB-231 sublines are significantly associated with the cell cycle, cellular proliferation and DNA replication functionalities. (B) The differential regulation of cell cycle and proliferation genes in the MDA-MB-231 transfectants and MCF-7 cells in response to estrogen stimulation.

**A**

| Category                                   | p-value           |
|--------------------------------------------|-------------------|
| Cell Cycle                                 | 7.27E-12-4.69E-04 |
| Cellular Growth and Proliferation          | 1.84E-08-4.74E-04 |
| DNA Replication, Recombination, and Repair | 8.96E-08-1.28E-04 |

**B**

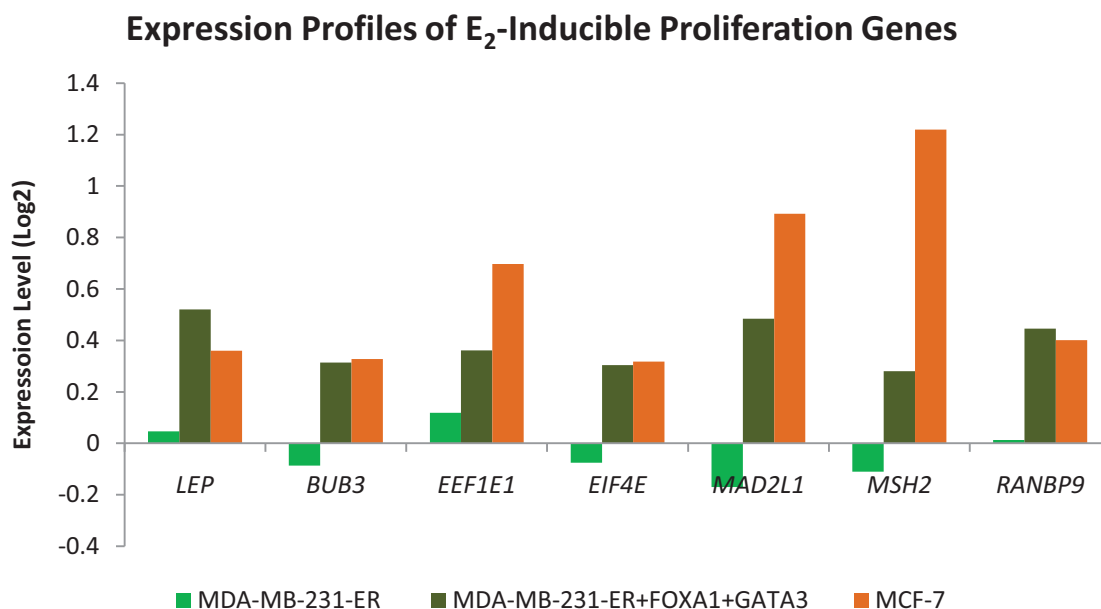

Supplemental Figure S14. We compared the expression profile of luminal and basal marker genes defined by Kao *J et al.* in the transfected MDA-MB-231 cells. (A) We observed that there is induced expression of luminal marker genes in the ER $\alpha$ +FOXA1+GATA3-expressing MDA-MB-231 cells as compared to ER $\alpha$ -only or vector-control MDA-MB-231 cells. We included the expression of MCF-7 cells that is defined as luminal subtype as comparison. (B) There is reduced expression of basal marker genes in the ER $\alpha$ +FOXA1+GATA3-expressing MDA-MB-231 cells as compared to ER $\alpha$ -only or vector-control MDA-MB-231 cells. (C) This barplot represented the average expression difference of luminal and basal marker genes in ER $\alpha$ +FOXA1+GATA3-expressing MDA-MB-231 cells as compared to vector-control MDA-MB-231 cells.

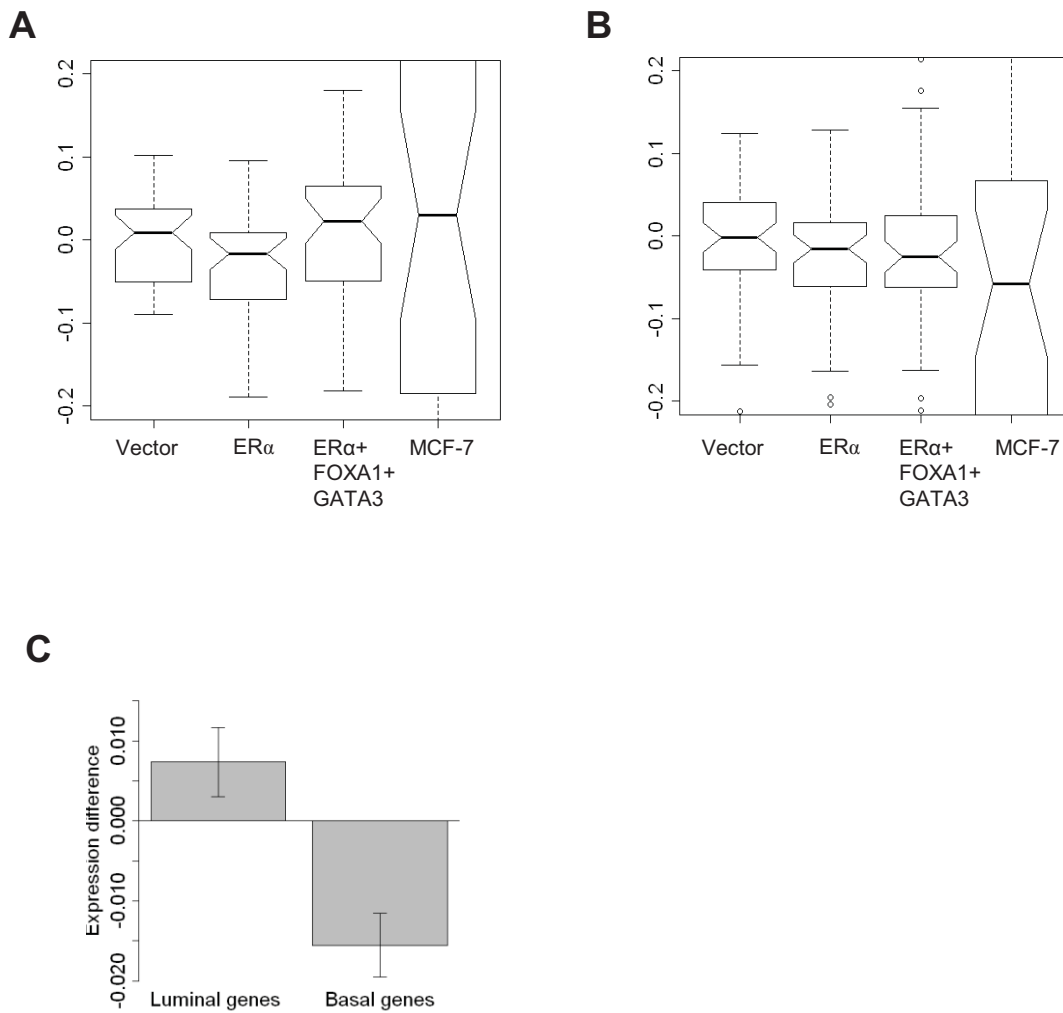

Figure S15. The presence of ER $\alpha$ , FOXA1 and GATA3 bindings at 20kb around the TSS of luminal and basal marker genes defined by Kao *et al.* (A) We demonstrated that ER $\alpha$ , FOXA1 and GATA3 bindings present in 63% of the luminal marker genes, only 13% of these luminal marker genes have no association with either TF binding. (B) The ER $\alpha$ , FOXA1 and GATA3 bindings are only present in 23% of the basal marker genes while there are as many as 40% of these genes have no association with either of these 3 TFs bindings.

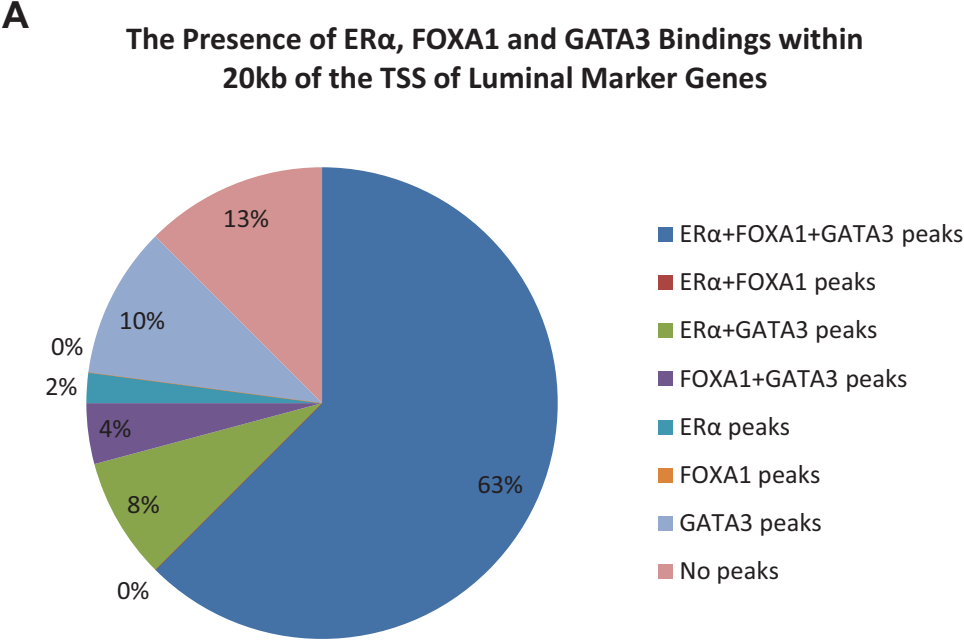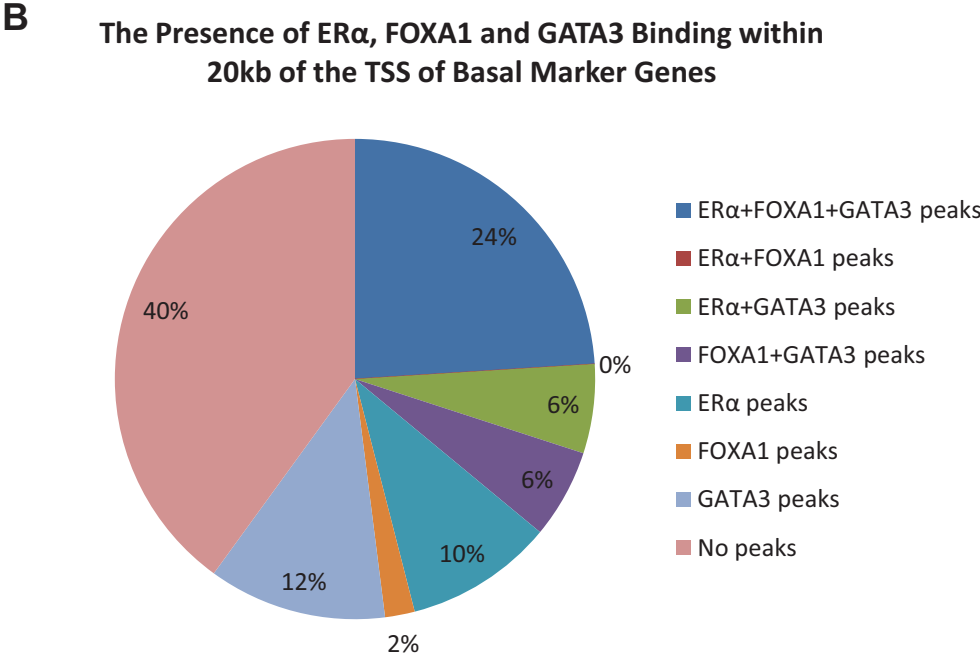

Figure S16. The presence of ER $\alpha$ , FOXA1 and GATA3 recognition motifs. The position weight matrix from de novo motif finding by the Pomoda (Peak Oriented Motif Discovery Algorithm) was used to screen for the co-existing of the TF's motif in the human genome as compared to the random sequences of 200Mb with the cutoff of 1E-4. There is a 64-fold enrichment for the co-localization of ER $\alpha$ +FOXA1+GATA3 motif in the reference human genome as compare to the random nucleotide sequences.

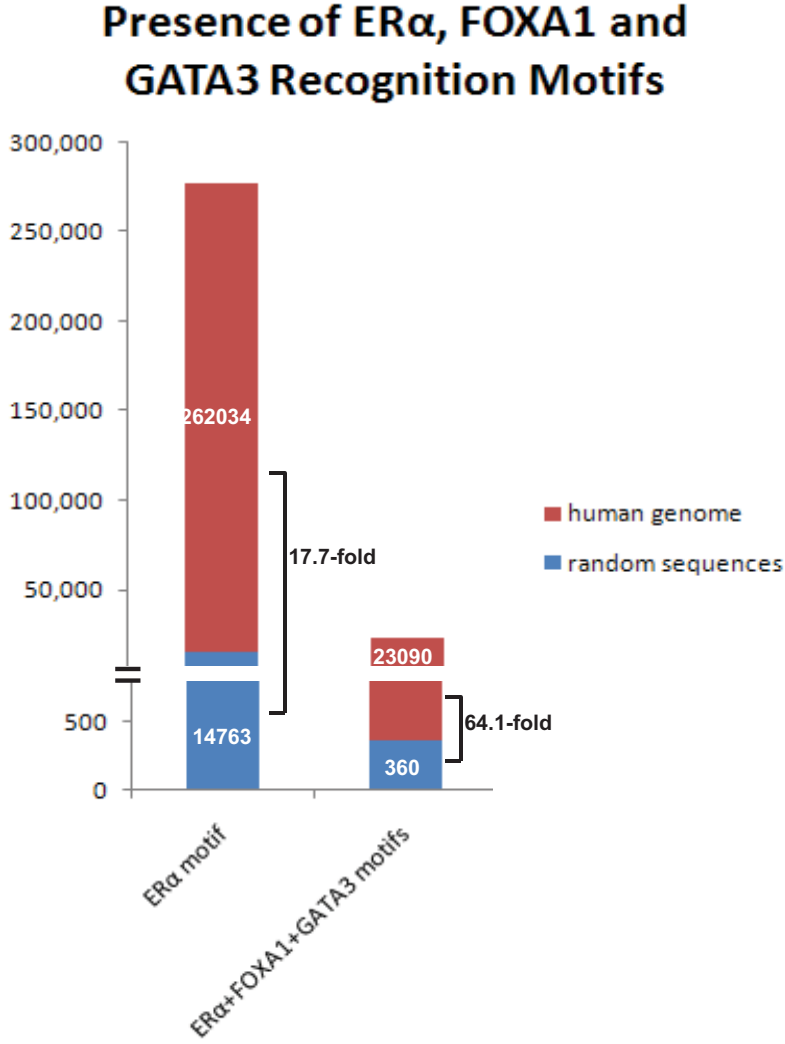

Supplement: msb201159-s1.pdf [file msb201159-s1.pdf]
